# Supplementary material for: A role for antibiotic biosynthesis monooxygenase domain proteins in fidelity control during aromatic polyketide biosynthesis
Source: PubMed Central journal article supplement (PMC6689052; doi:10.1038/s41467-019-11538-6), 2019-08-09
Supplement: 41467_2019_11538_MOESM1_ESM.pdf [file 41467_2019_11538_MOESM1_ESM.pdf]

**A role for antibiotic biosynthesis monooxygenase domain proteins  
in fidelity control during aromatic polyketide biosynthesis**

Qin *et al.*

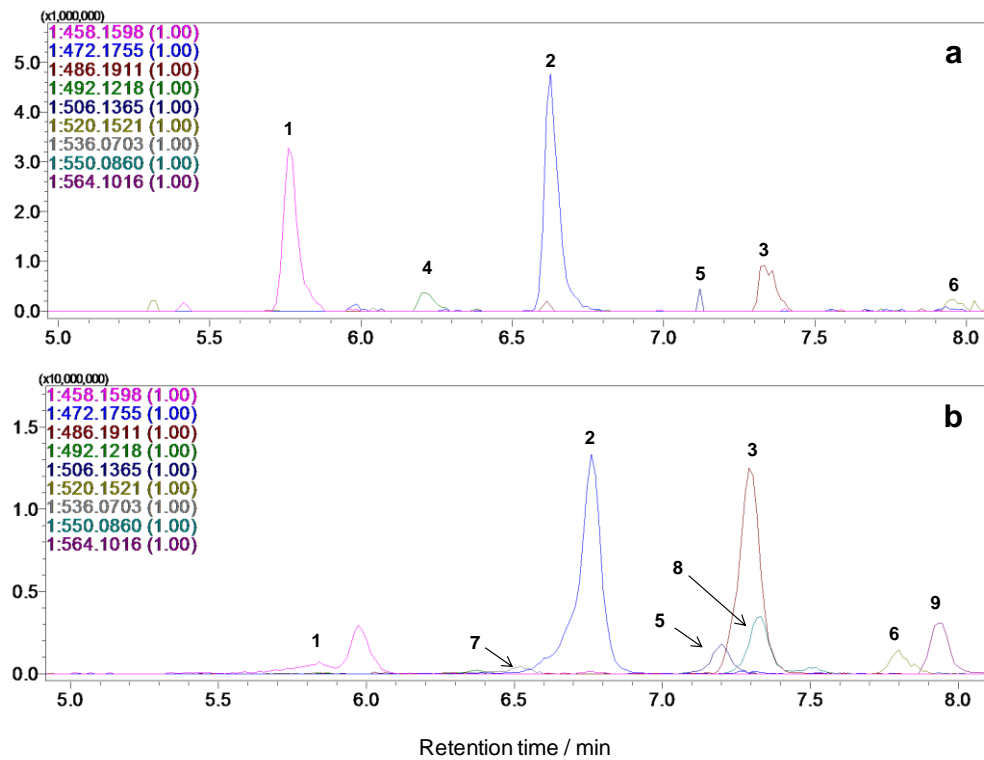

**Supplementary Figure 1. Extracted ion chromatograms for 1-9 from LCMS runs of extracts from the WT strain grown on MS agar medium. (a) without exogenous addition of NaBr; (b) with exogenous addition of NaBr. The slight shifts in retention times for 1-6 was due to machine maintenance carried out between the experiments.**

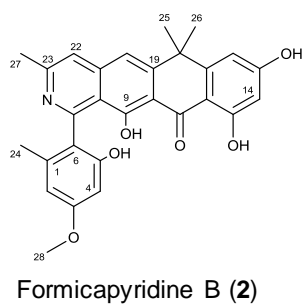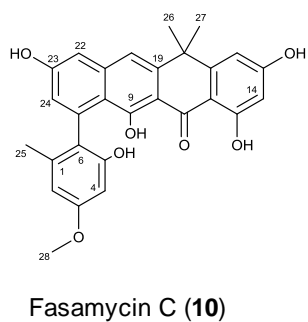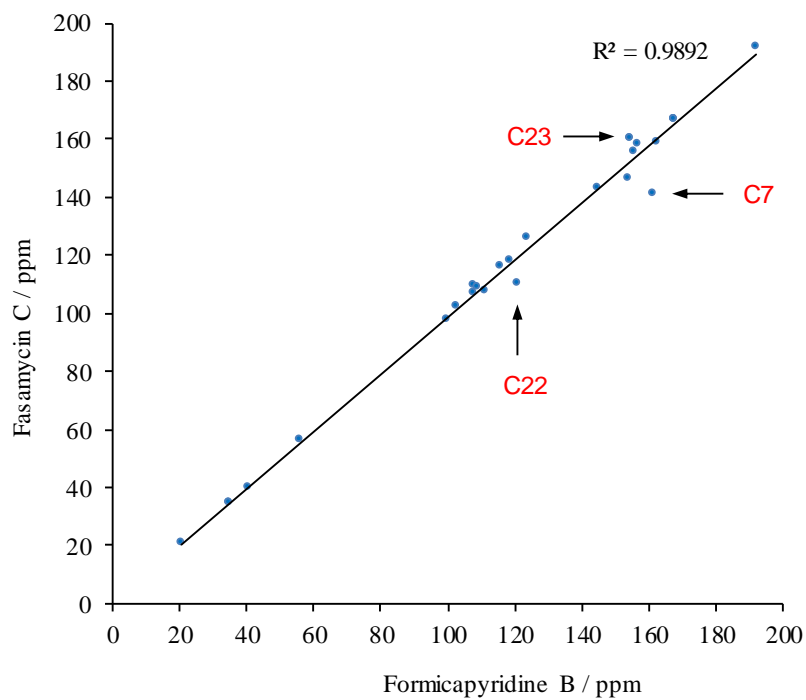

**Supplementary Figure 2. Comparison of the  $^{13}\text{C}$  NMR chemical shifts for formicapyridine B and fasamycin C. The chemical shifts for carbons C7, C22 and C23 are highlighted.**

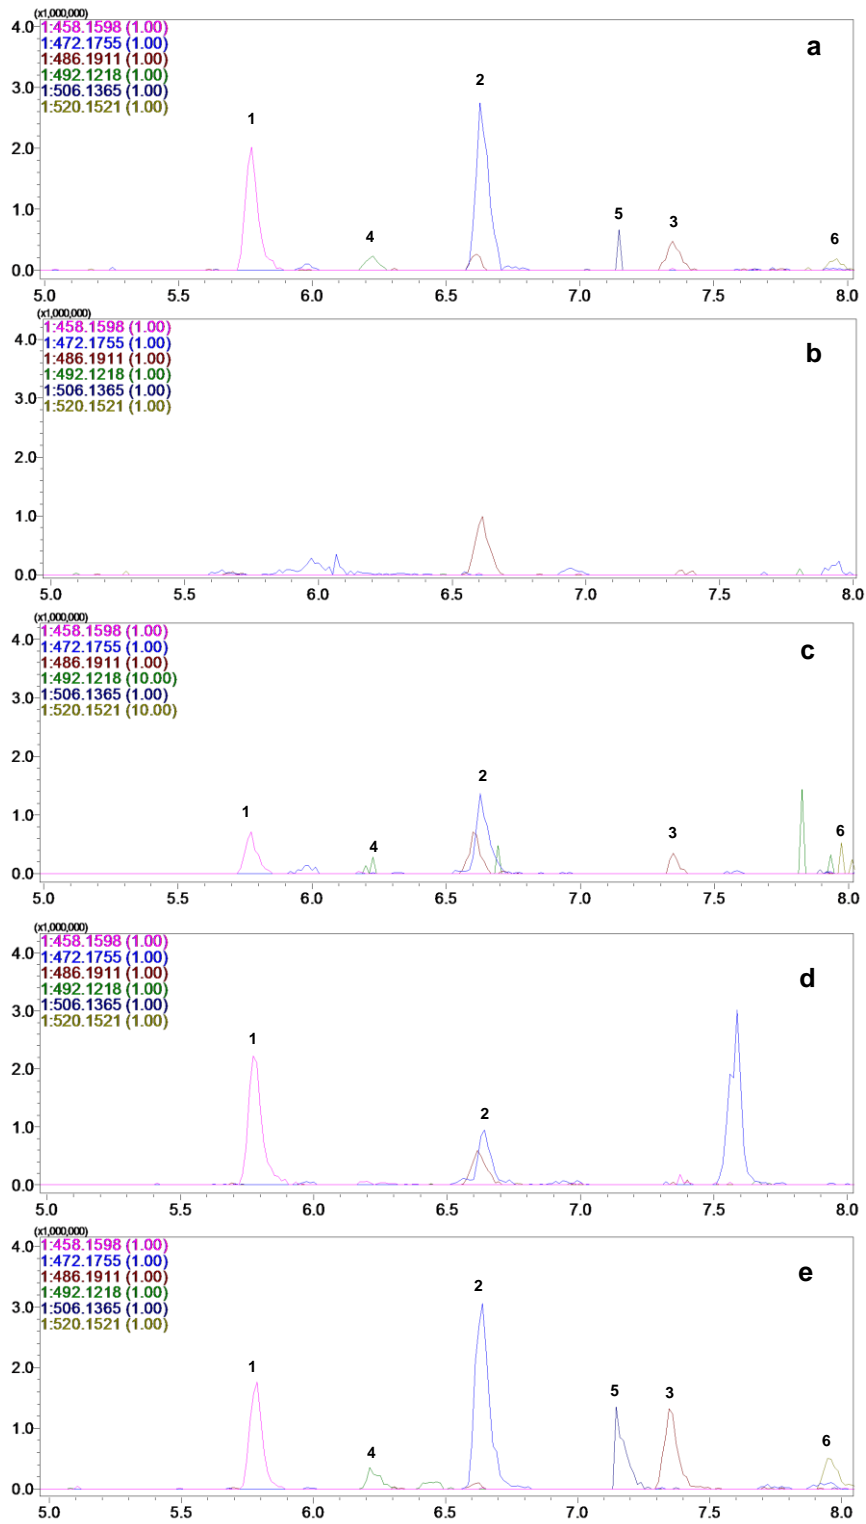

**Supplementary Figure 3. Reconstituted LCMS extracted ion chromatograms for 1-6.** (a) *S. formicae* WT extract; (b) *S. formicae*  $\Delta for$  extract; (c) *S. formicae*  $\Delta for/for$  extract; (d) *S. formicae*  $\Delta forV$  extract; (e) *S. formicae*  $\Delta forV/forV$  extract. The signal abundance of 4 and 6 in (c) was enlarged  $\times 10$  for clarity.

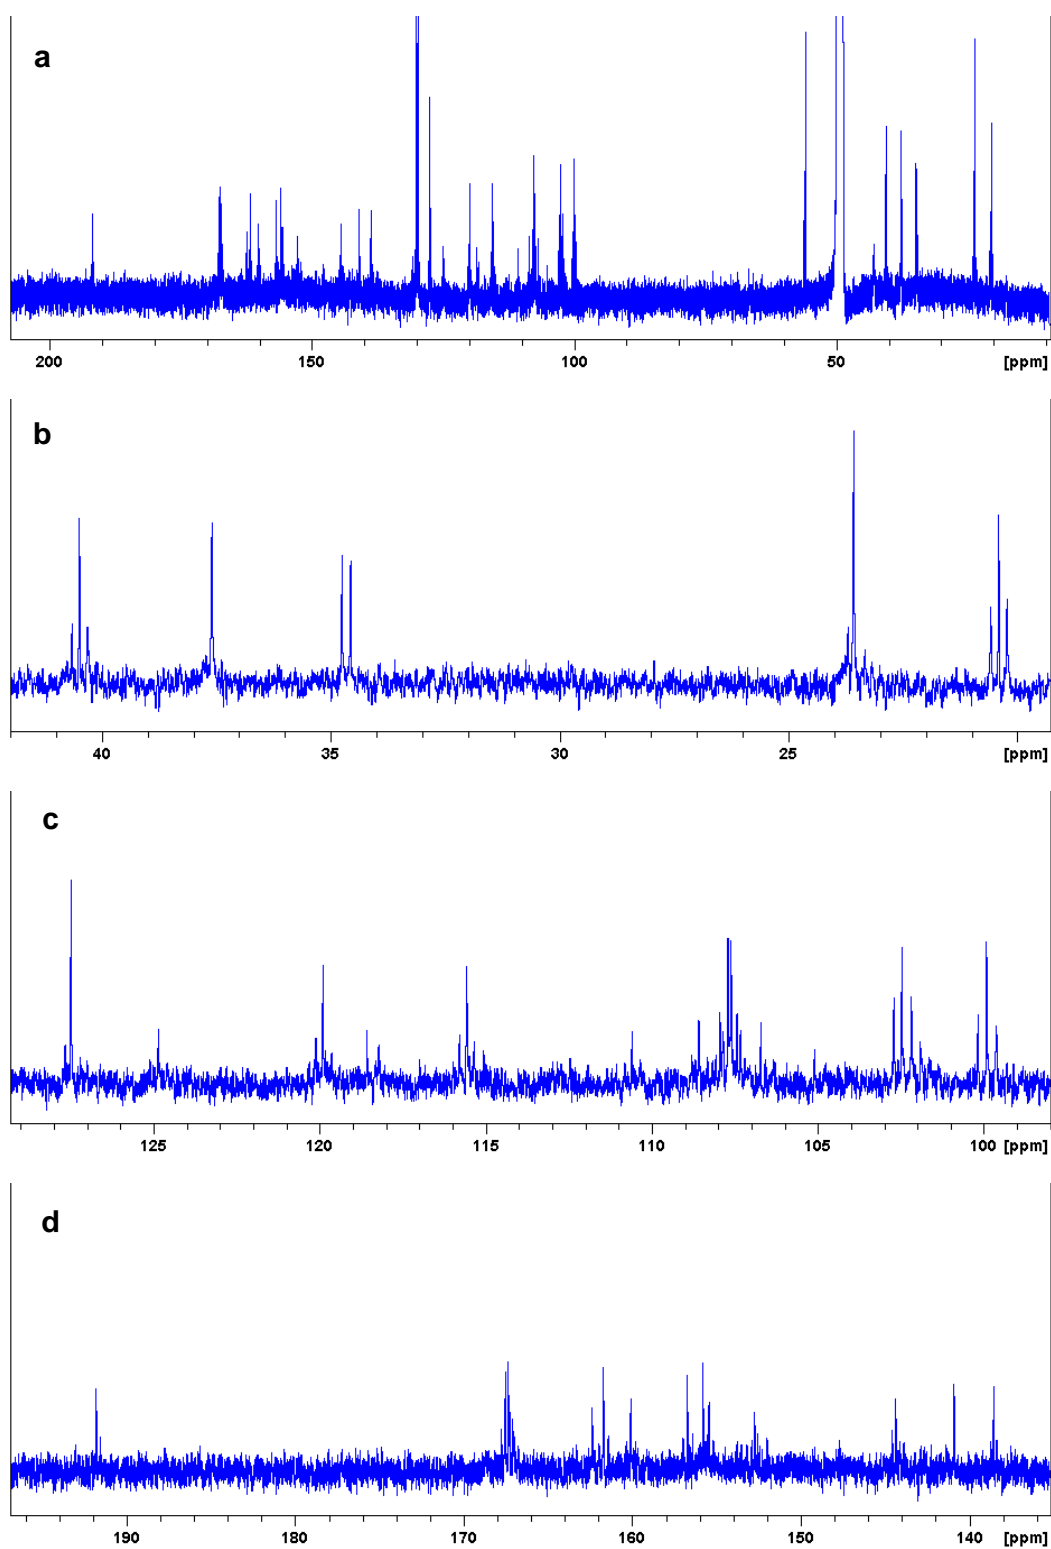

**Supplementary Figure 4.**  $^{13}\text{C}$  NMR spectra of 2 isolated after growth of *S. formicae* WT in the presence of  $[1,2-^{13}\text{C}_2]$  sodium acetate. (a), full scale; (b)-(d), expanded scale. Condition: 125 MHz, methanol- $d_6$ .

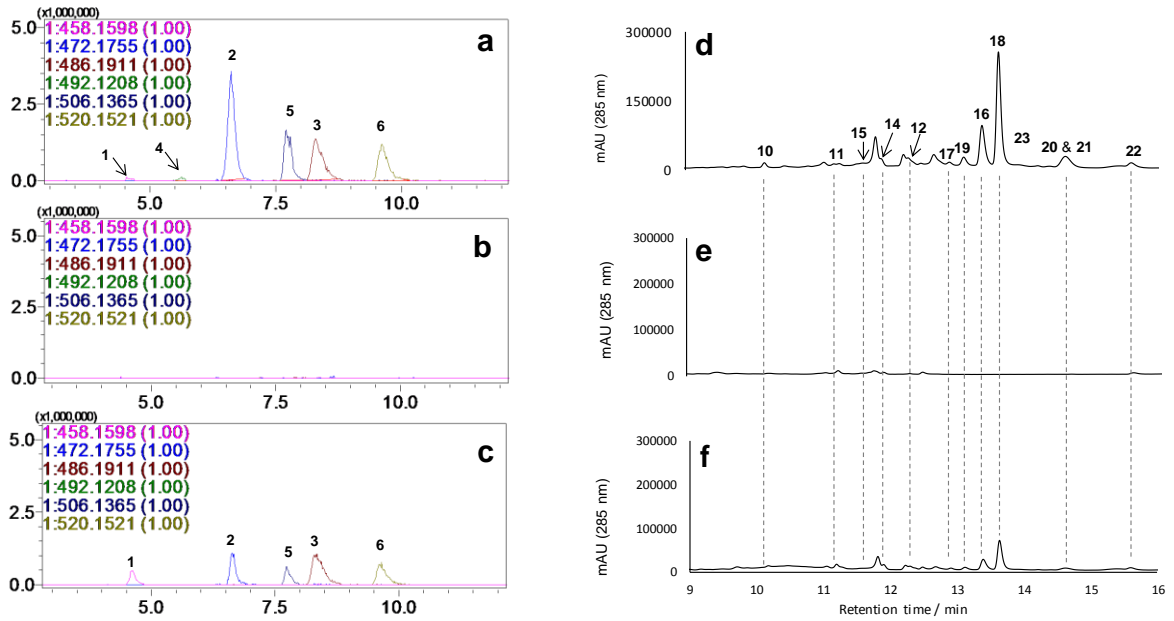

**Supplementary Figure 5. Mutational analysis of *forD*.** Extracted ion chromatogram (left) and reconstituted HPLC-UV (285 nm) profiles (right) for extracts of *forD* mutagenesis and complementation experiments: (a) and (d) *S. formicae* wild-type; (b) and (e) *S. formicae*  $\Delta forD$ ; (c) and (f) *S. formicae*  $\Delta forD/forD$ .

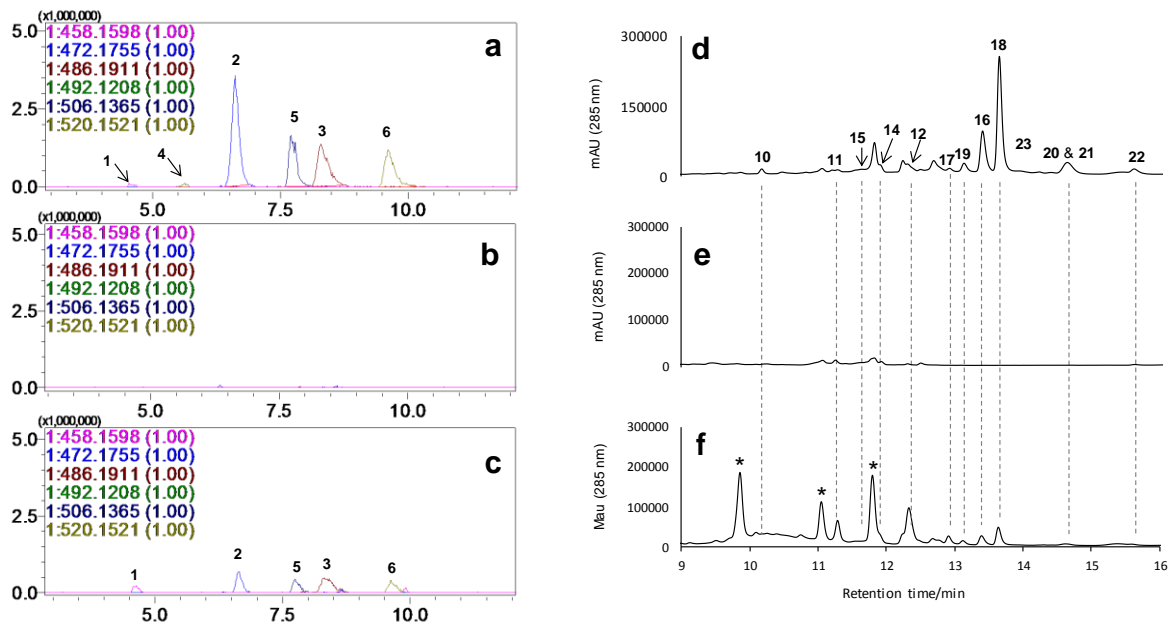

**Supplementary Figure 6. Mutational analysis of *forL*.** Extracted ion chromatogram (left) and reconstituted HPLC-UV (285 nm) profiles (right) for extracts of *forL* mutagenesis and complementation experiments: (a) and (d) *S. formicae* wild-type; (b) and (e) *S. formicae*  $\Delta forL$ ; (c) and (f) *S. formicae*  $\Delta forL/forL$ . The molecular species giving rise to peaks labelled with an asterisk \* are unrelated to the *for* pathway and correspond to a metabolite produced variably by *S. formicae* KY5.

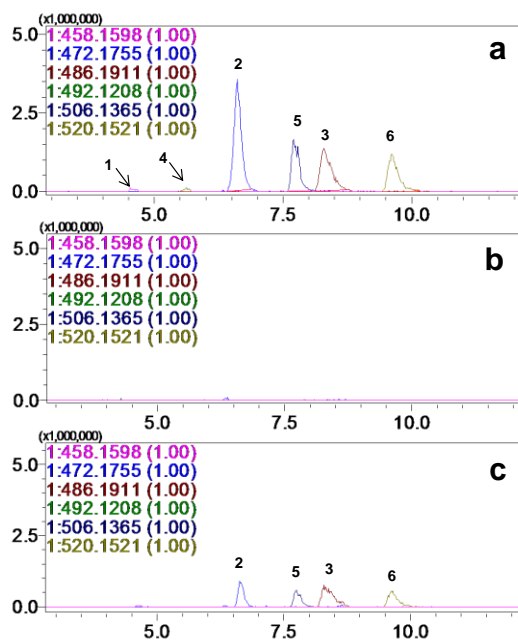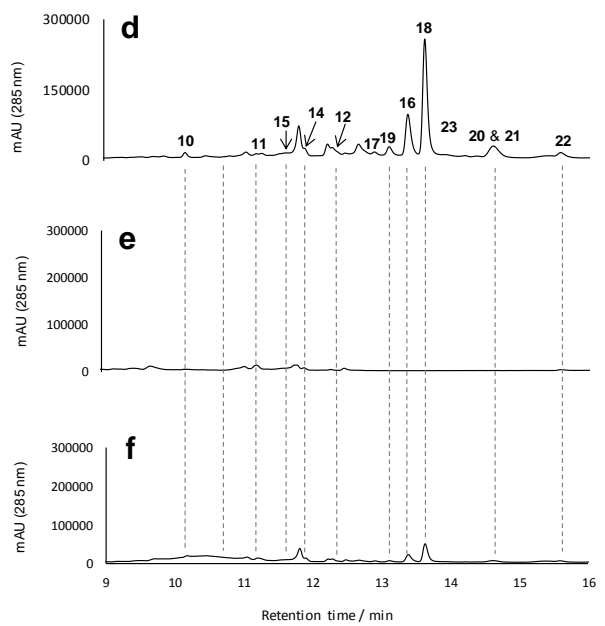

**Supplementary Figure 7. Mutational analysis of *forR*.** Extracted ion chromatogram (left) and reconstituted HPLC-UV (285 nm) profiles (right) for extracts of *forR* mutagenesis and complementation experiments: (a) and (d) *S. formicae* wild-type; (b) and (e) *S. formicae*  $\Delta forR$ ; (c) and (f) *S. formicae*  $\Delta forR/forR$ .



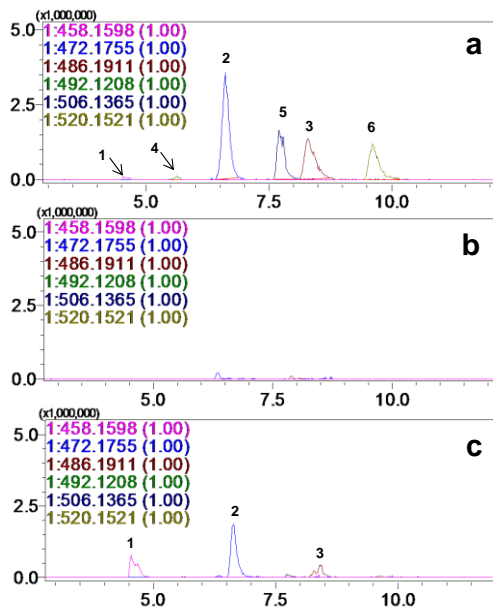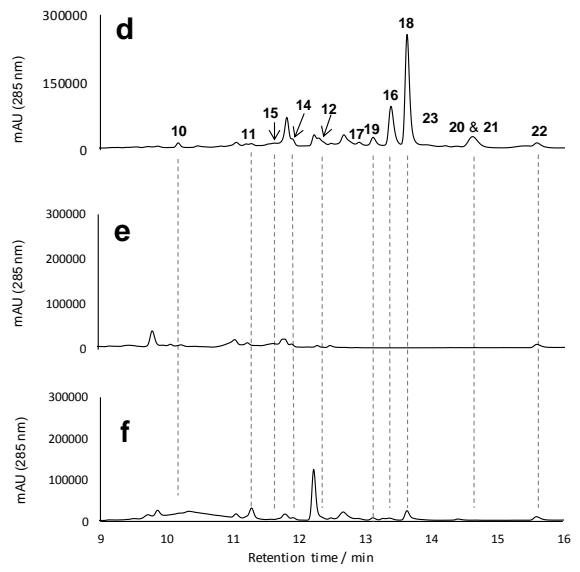

**Supplementary Figure 8. Mutational analysis of *forU*.** Extracted ion chromatogram (left) and reconstituted HPLC-UV (285 nm) profiles (right) for extracts of *forU* mutagenesis and complementation experiments: (a) and (d) *S. formicae* wild-type; (b) and (e) *S. formicae*  $\Delta forU$ ; (c) and (f) *S. formicae*  $\Delta forU/forUV$ .

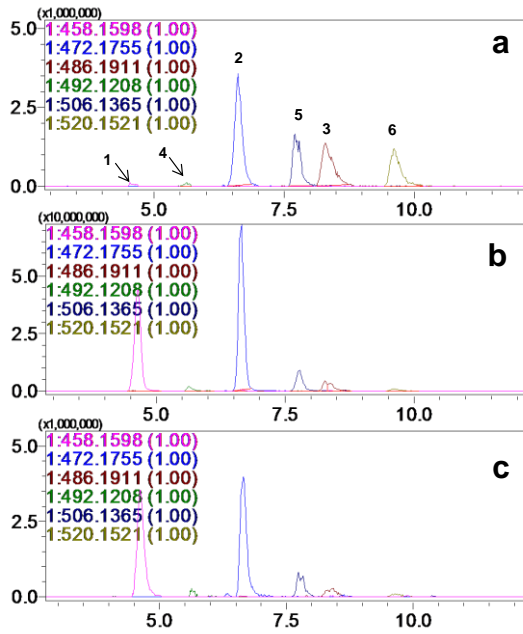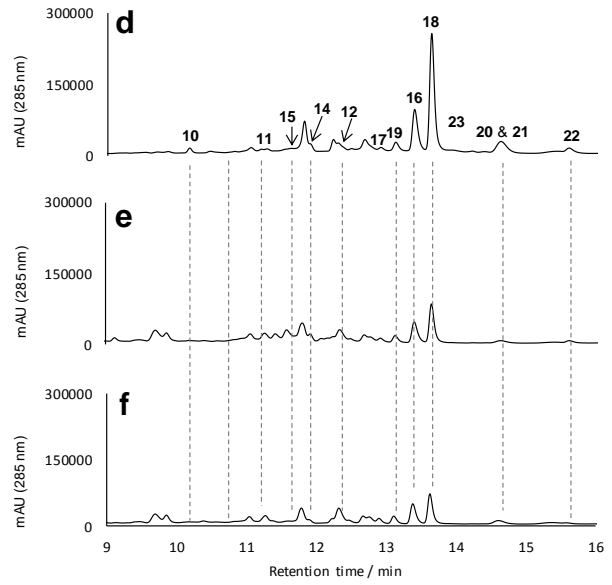

**Supplementary Figure 9. Mutational analysis of *forS*.** Extracted ion chromatogram (left) and reconstituted HPLC-UV (285 nm) profiles (right) for extracts of *forS* mutagenesis and complementation experiments: (a) and (d) *S. formicae* wild-type; (b) and (e) *S. formicae*  $\Delta forS$ ; (c) and (f) *S. formicae*  $\Delta forS/forS$ .

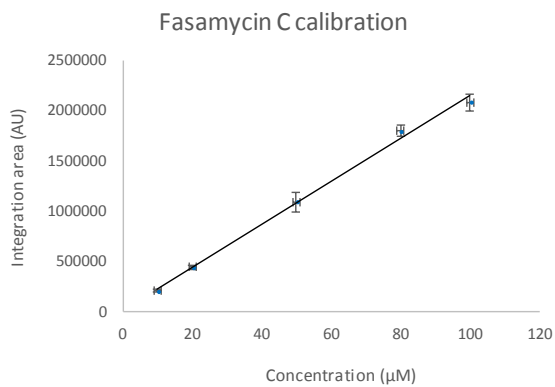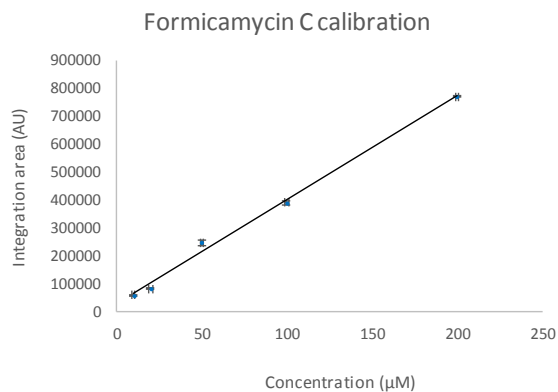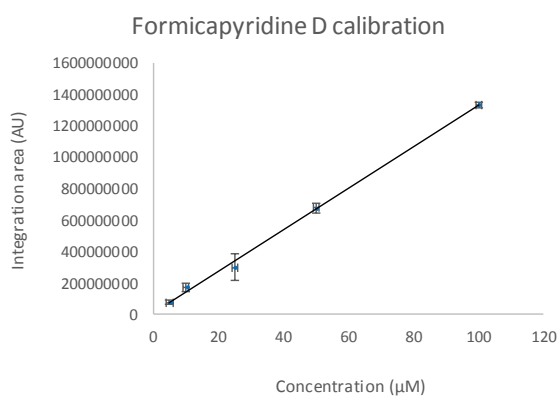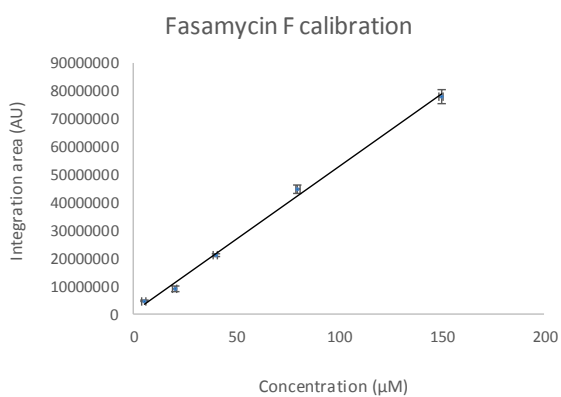

**Supplementary Figure 10. Representative calibration curves.** Fasamycin C (10); formicamycin C (16); formicapyridine D (4); and fasamycin F (13). Each data point of the calibration curves is the mean  $\pm$  standard deviation,  $n = 3$ .

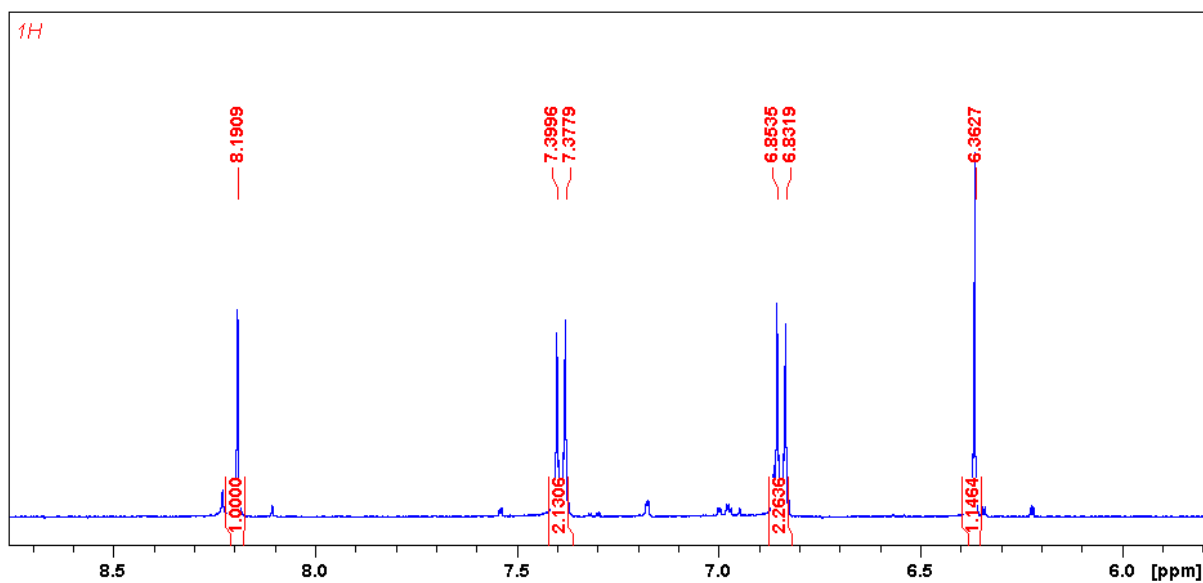

Supplementary Figure 11. <sup>1</sup>H NMR spectrum for 6-chlorogenistein. Condition: CD<sub>3</sub>OD, 400 MHz.

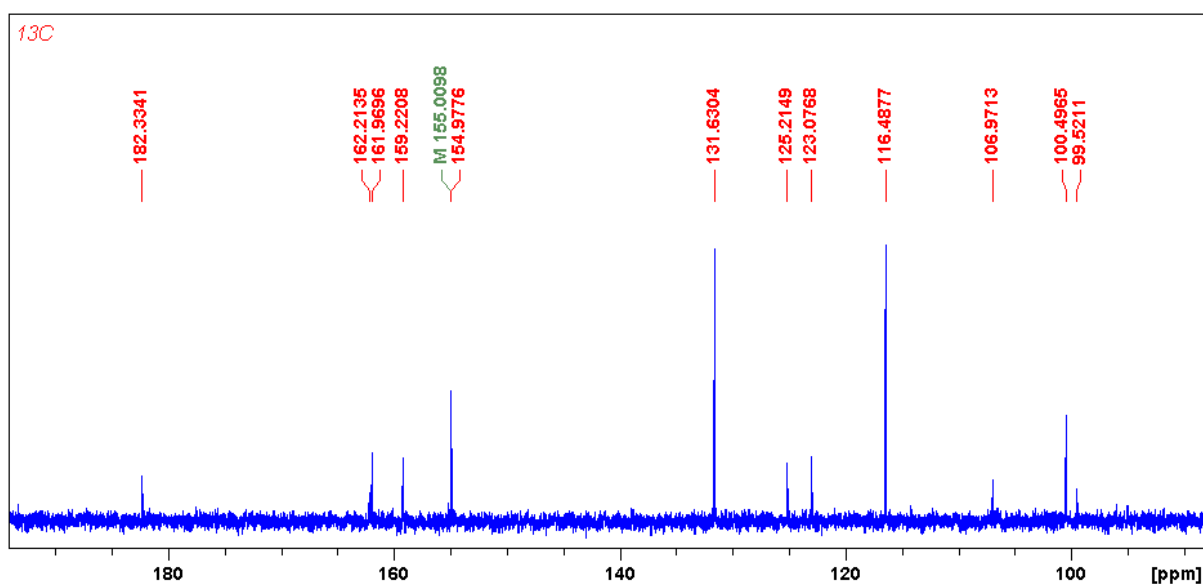

Supplementary Figure 12. <sup>13</sup>C NMR spectrum for 6-chlorogenistein. Condition: CD<sub>3</sub>OD, 100 MHz.

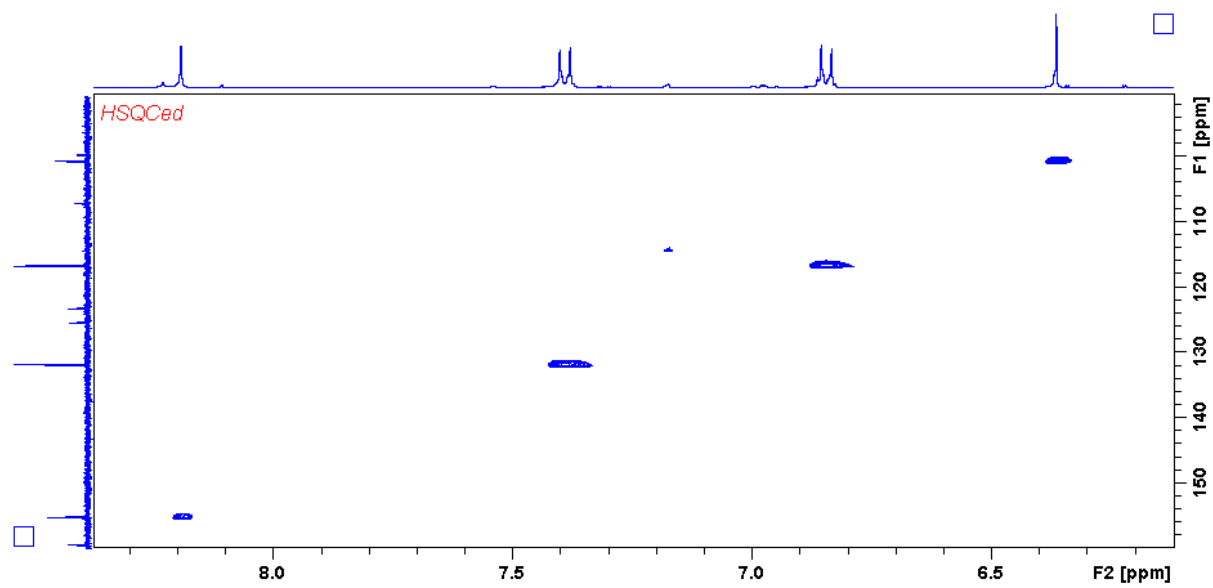

Supplementary Figure 13. HSQC spectrum for 6-chlorogenistein. Condition: CD<sub>3</sub>OD.

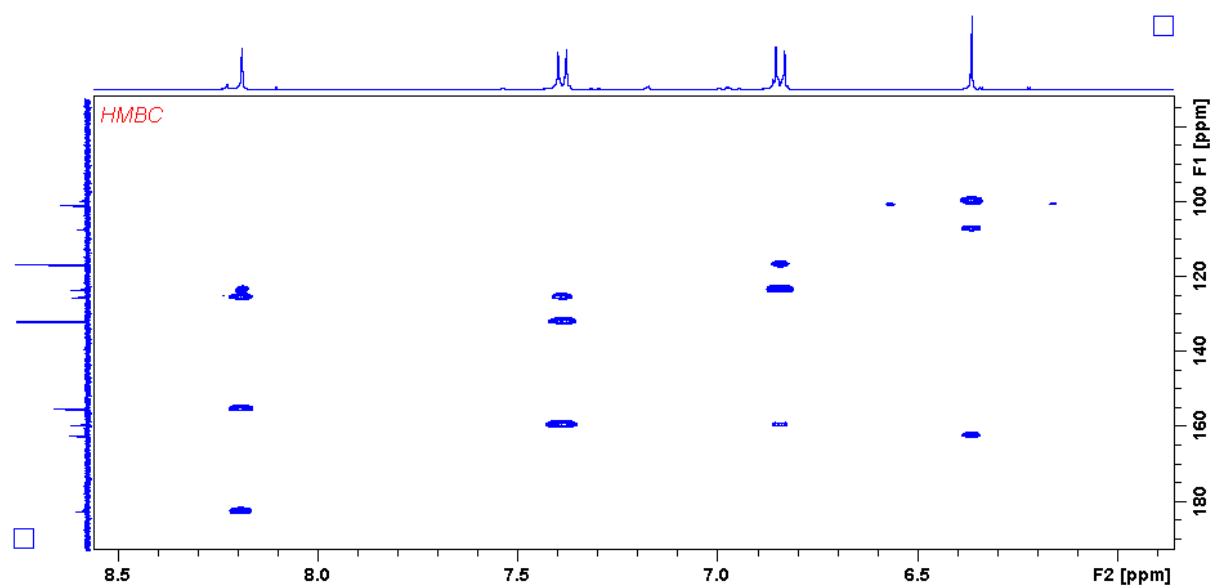

Supplementary Figure 14. HMBC spectrum for 6-chlorogenistein. Condition: CD<sub>3</sub>OD.

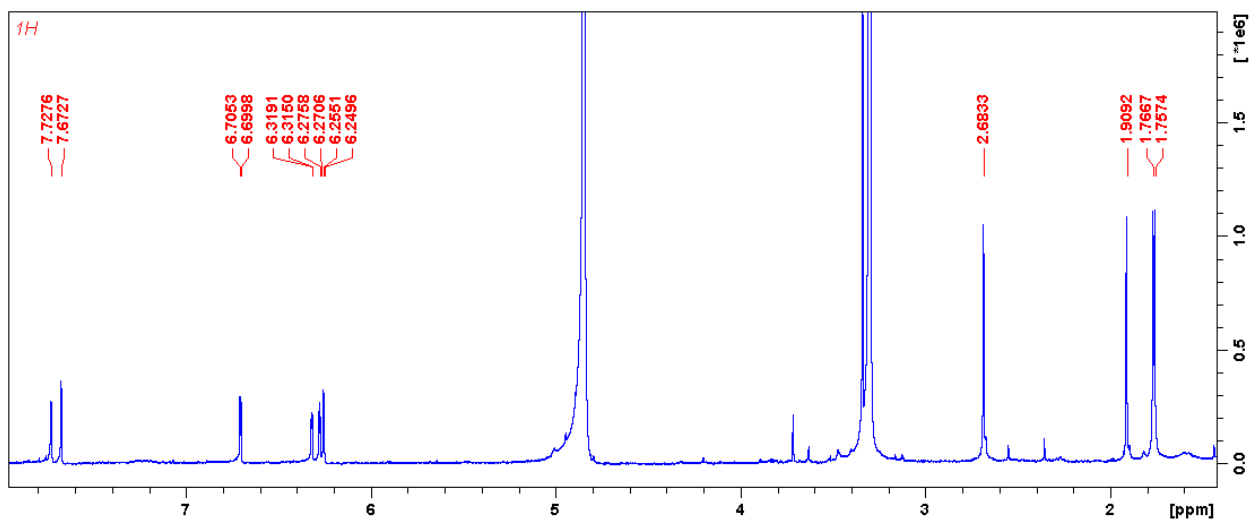

Supplementary Figure 15.  $^1\text{H}$  NMR spectrum for compound 1. Condition:  $\text{CD}_3\text{OD}$ , 400 MHz.

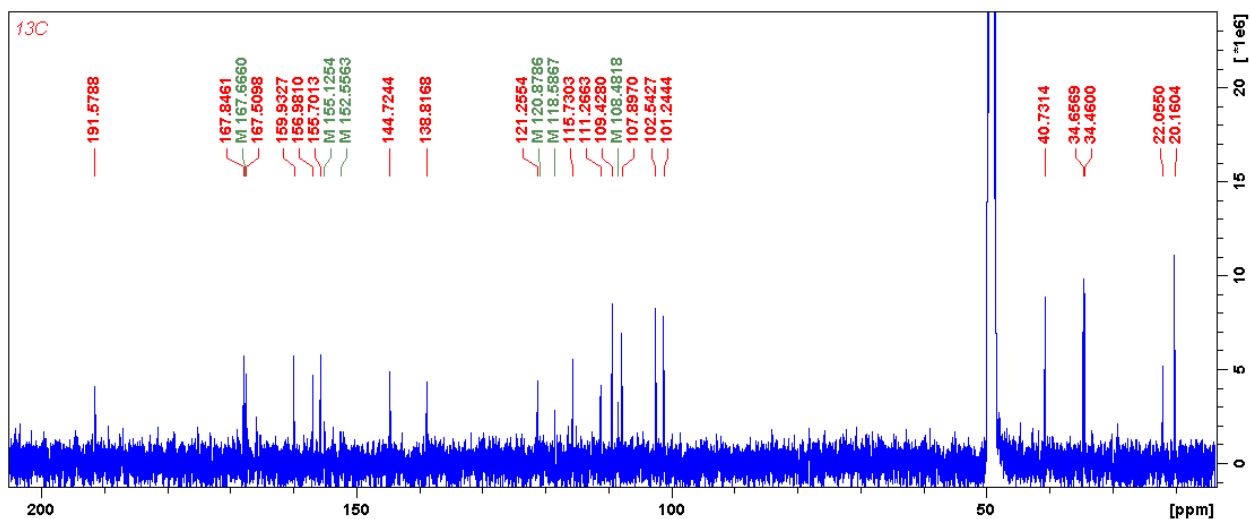

Supplementary Figure 16.  $^{13}\text{C}$  NMR spectrum for compound 1. Condition:  $\text{CD}_3\text{OD}$ , 100 MHz.

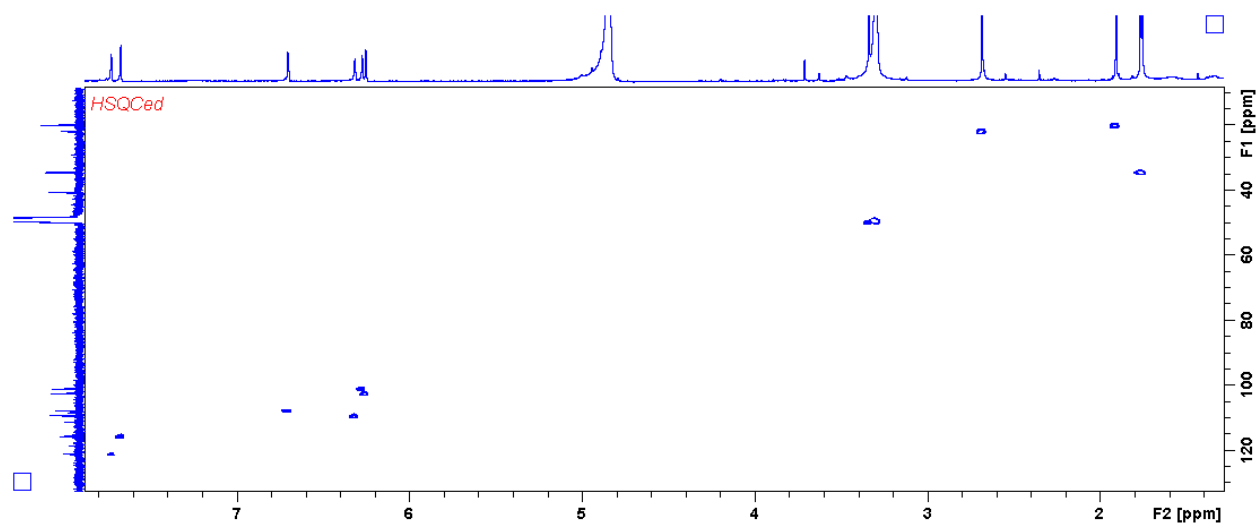

Supplementary Figure 17. HSQC spectrum for compound 1. Condition: CD<sub>3</sub>OD.

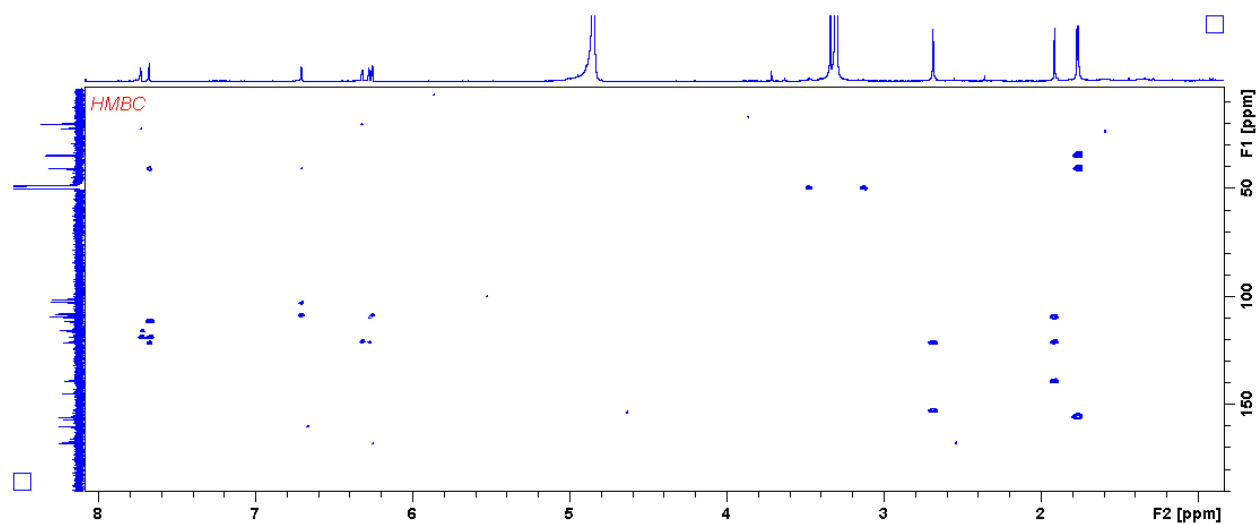

Supplementary Figure 18. HMBC spectrum for compound 1. Condition: CD<sub>3</sub>OD.

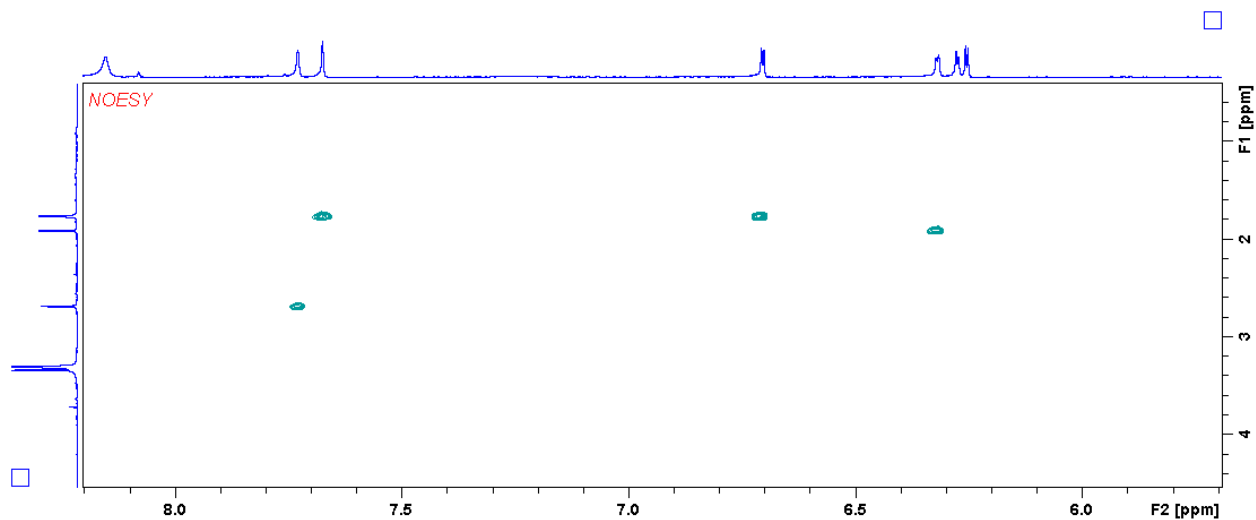

Supplementary Figure 19. NOESY spectrum for compound 1. Condition: CD<sub>3</sub>OD.

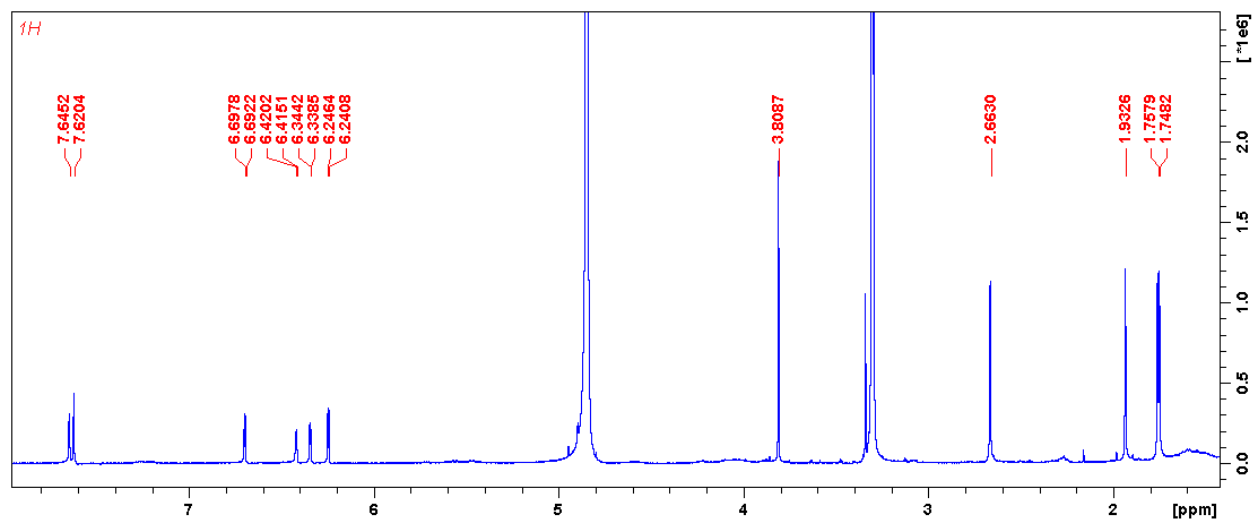

Supplementary Figure 20. <sup>1</sup>H NMR spectrum for compound 2. Condition: CD<sub>3</sub>OD, 400 MHz.



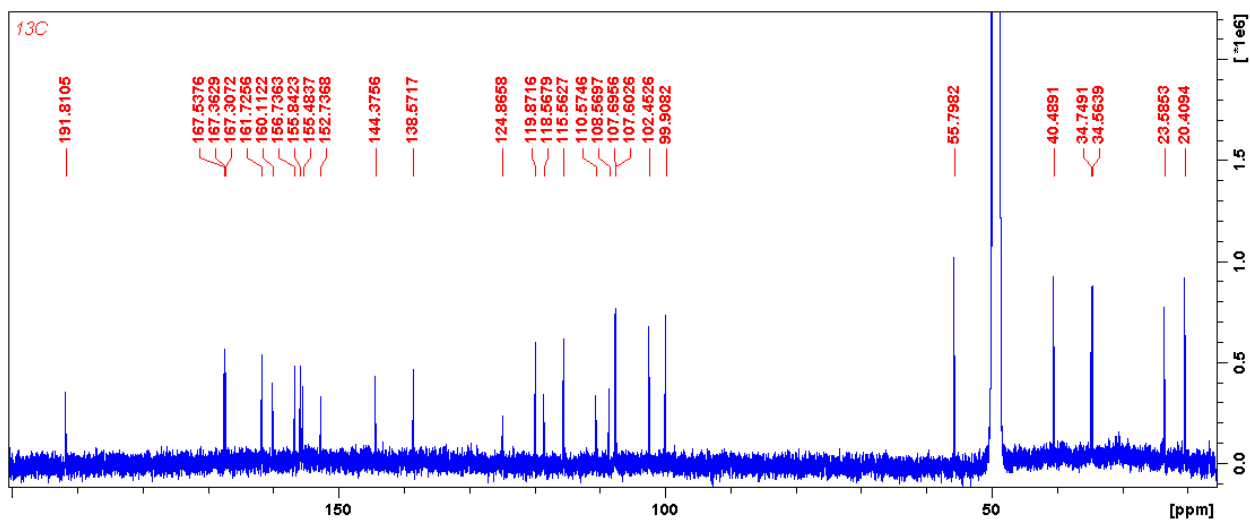

Supplementary Figure 21. <sup>13</sup>C NMR spectrum for compound 2. Condition: CD<sub>3</sub>OD, 100 MHz.

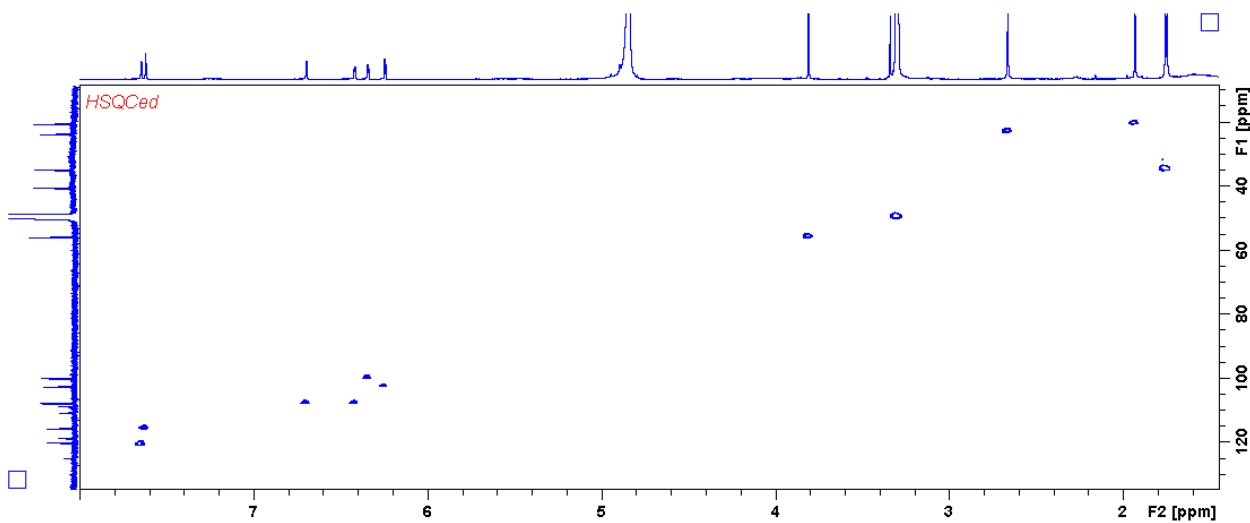

Supplementary Figure 22. HSQC spectrum for compound 2. Condition: CD<sub>3</sub>OD.

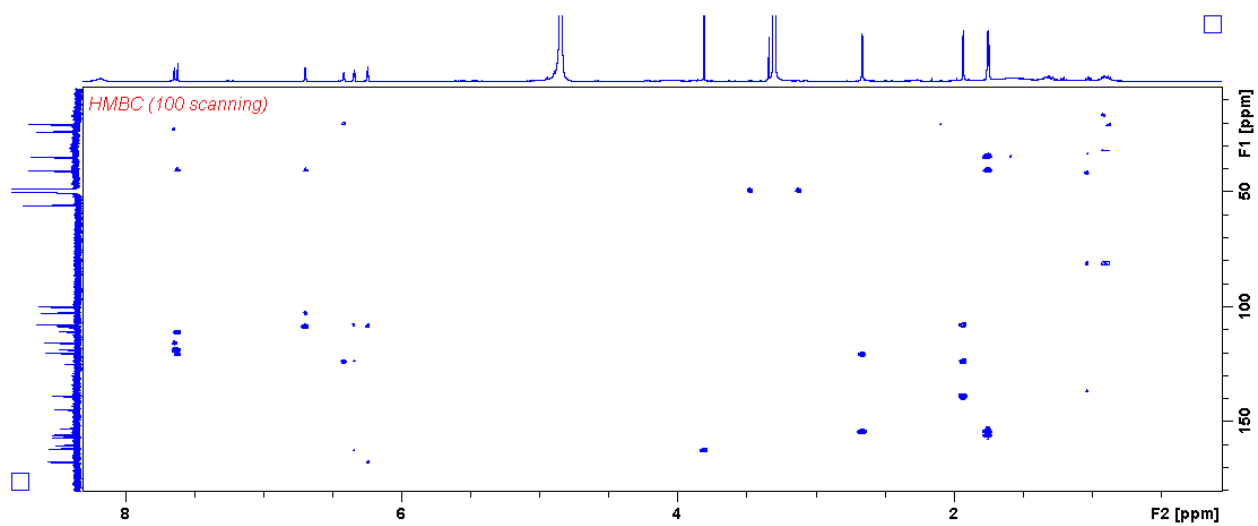

Supplementary Figure 23. HMBC spectrum for compound 2. Condition: CD<sub>3</sub>OD.

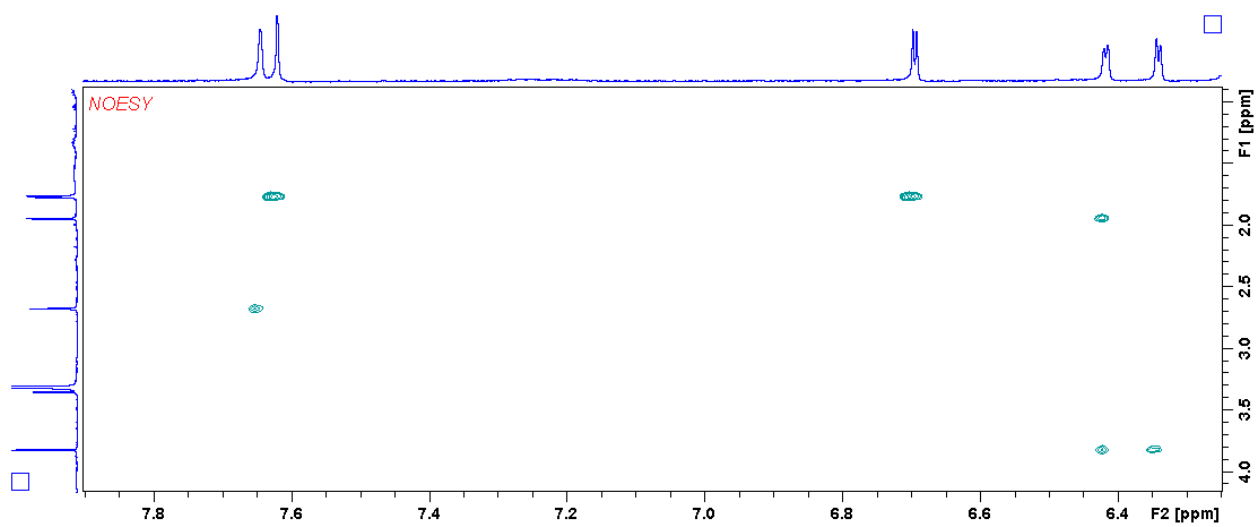

Supplementary Figure 24. NOESY spectrum for compound 2. Condition: CD<sub>3</sub>OD.

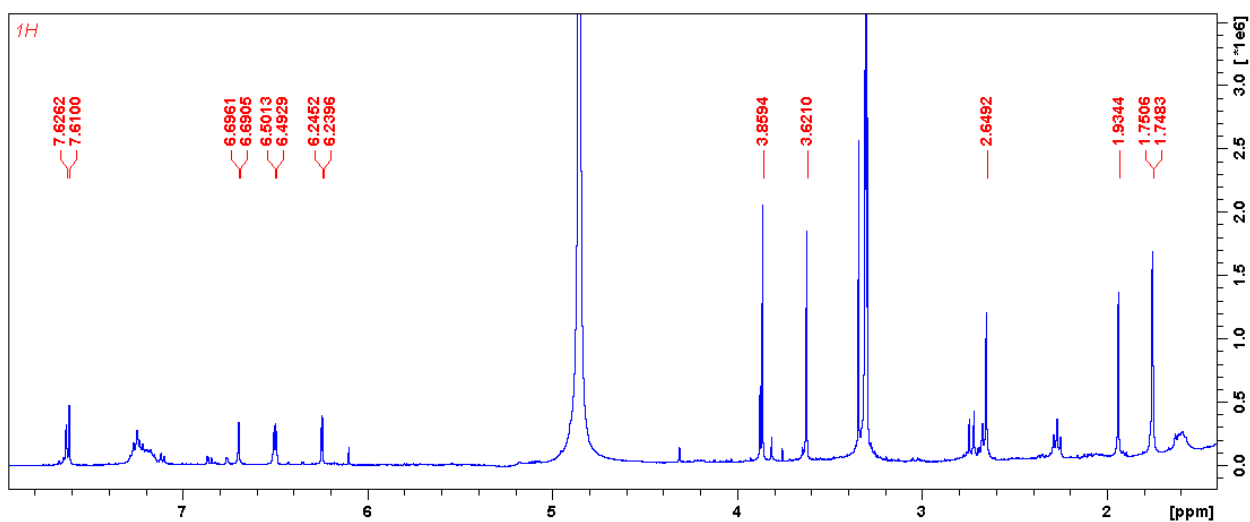

Supplementary Figure 25. <sup>1</sup>H NMR spectrum for compound 3. Condition: CD<sub>3</sub>OD, 400 MHz.

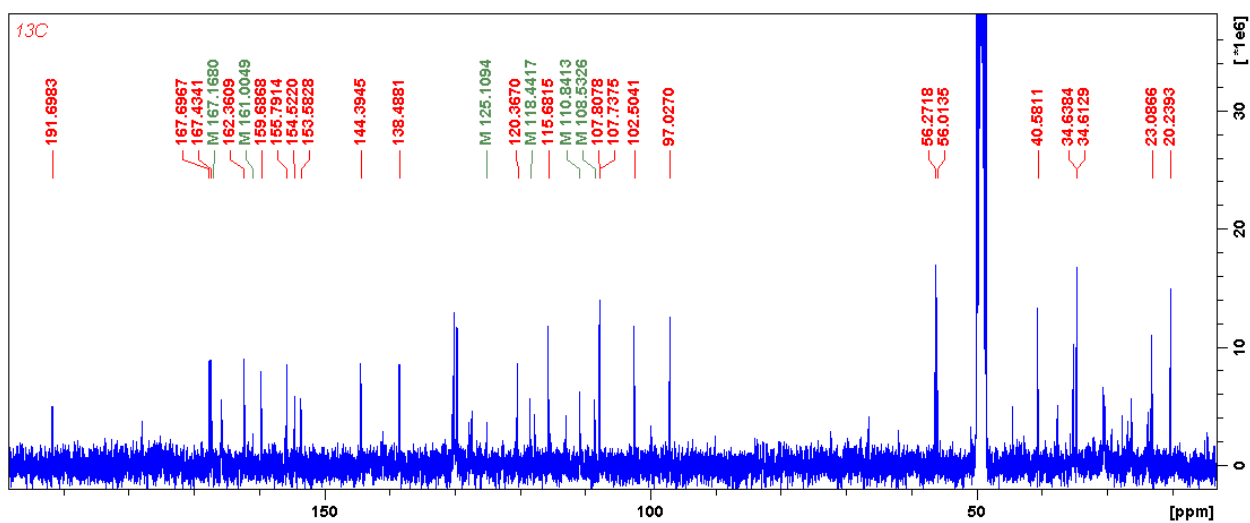

Supplementary Figure 26. <sup>13</sup>C NMR spectrum for compound 3. Condition: CD<sub>3</sub>OD, 100 MHz.

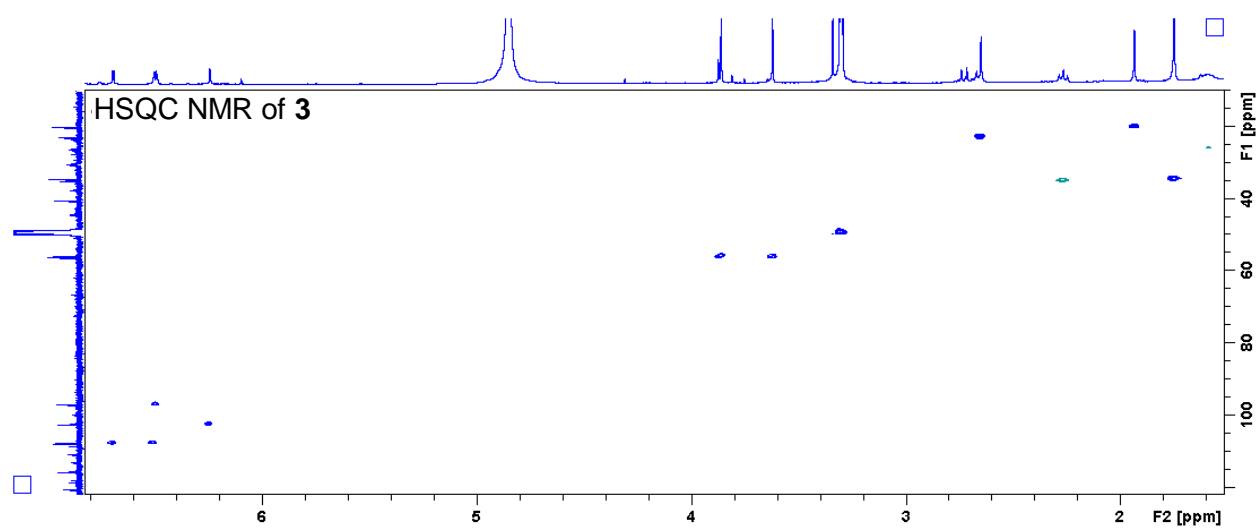

Supplementary Figure 27. HSQC spectrum for compound 3. Condition: CD<sub>3</sub>OD.

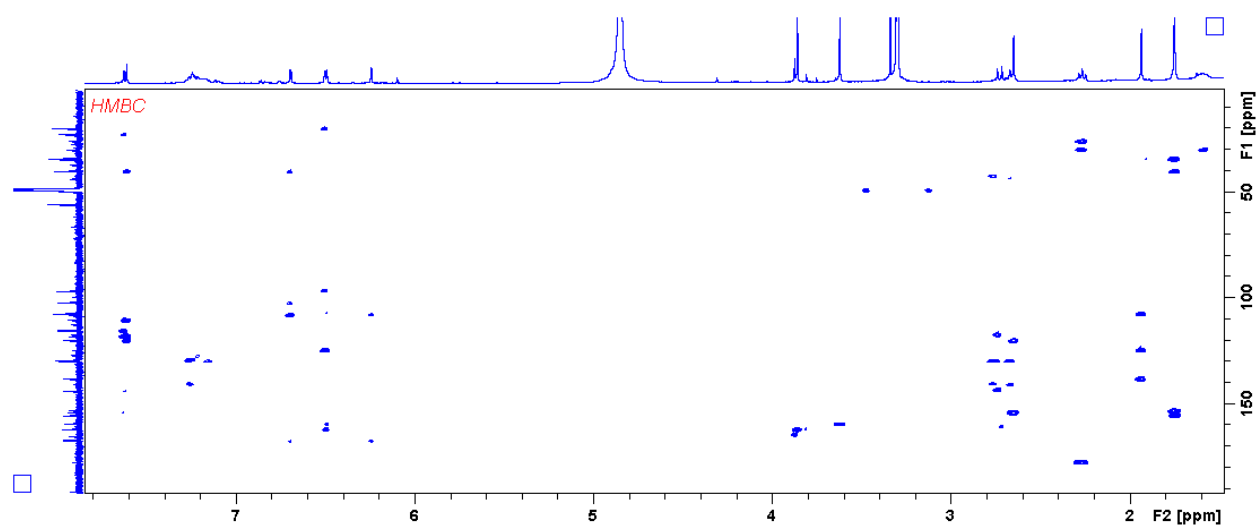

Supplementary Figure 28. HMBC spectrum for compound 3. Condition: CD<sub>3</sub>OD.

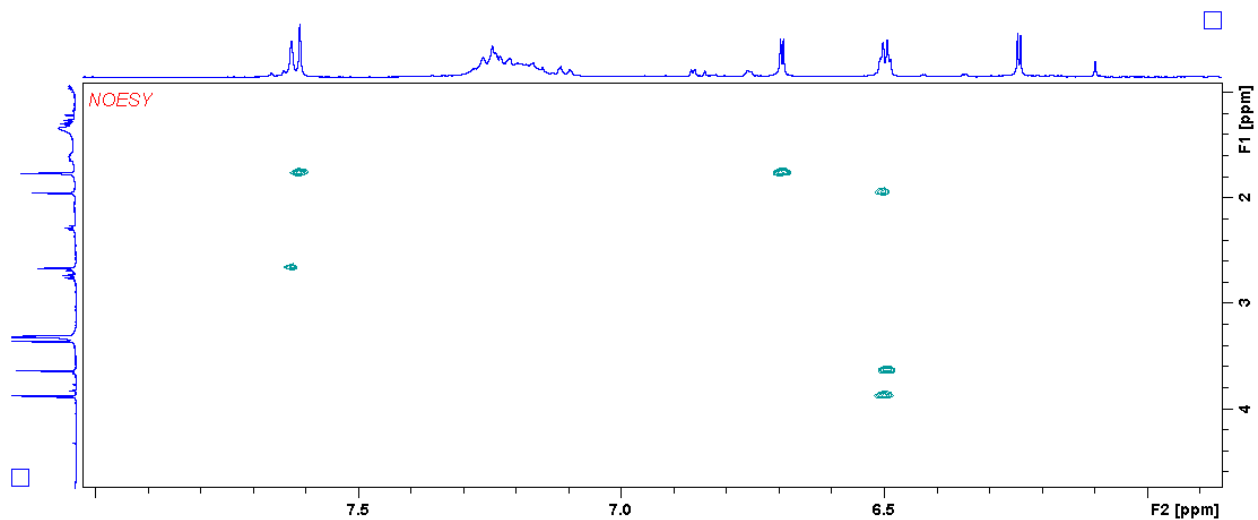

Supplementary Figure 29. NOESY spectrum for compound 3. Condition: CD<sub>3</sub>OD.

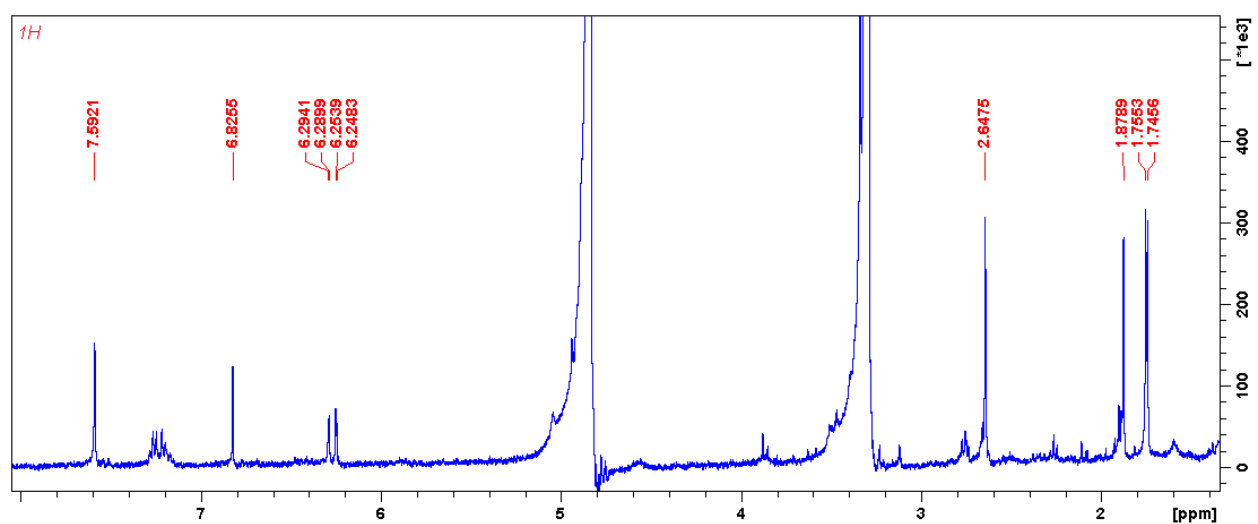

Supplementary Figure 30. <sup>1</sup>H NMR spectrum for compound 4. Condition: CD<sub>3</sub>OD, 400 MHz.

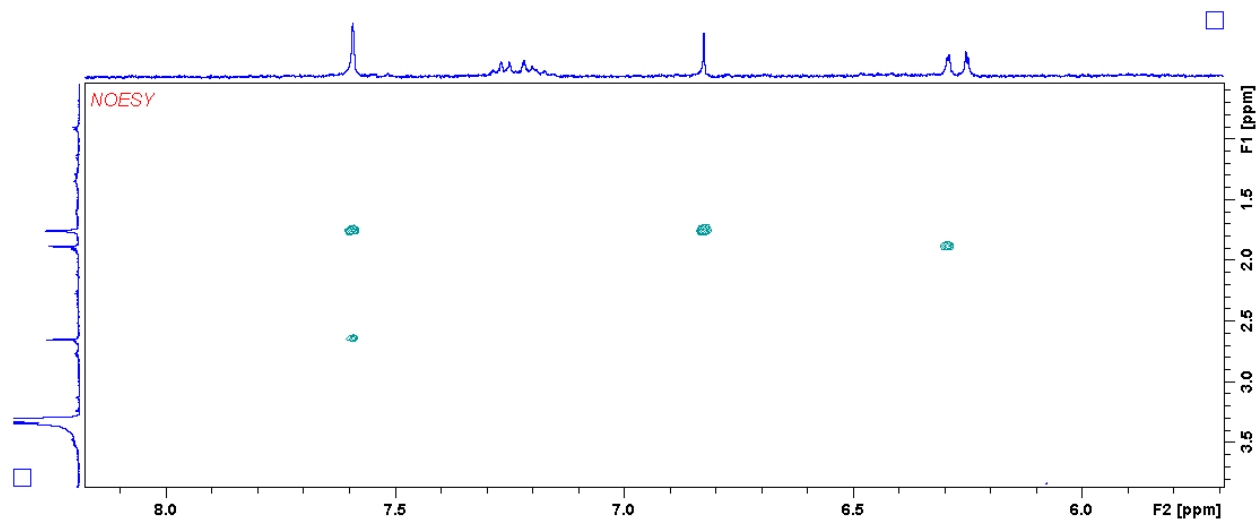

Supplementary Figure 31. NOESY spectrum for compound 4. Condition: CD<sub>3</sub>OD.

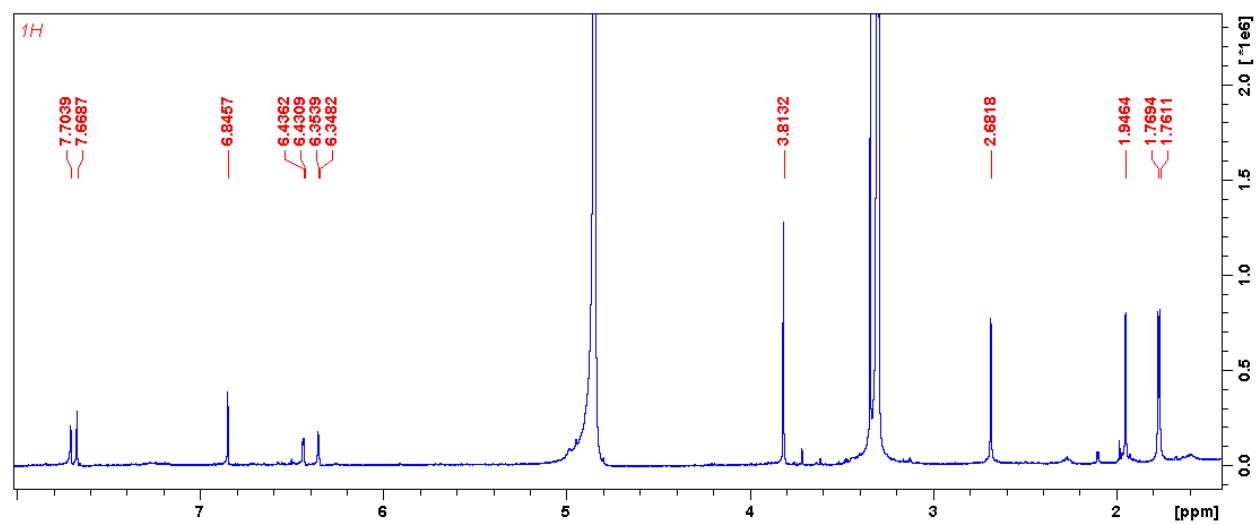

Supplementary Figure 32. <sup>1</sup>H NMR spectrum for compound 5. Condition: CD<sub>3</sub>OD, 400 MHz.

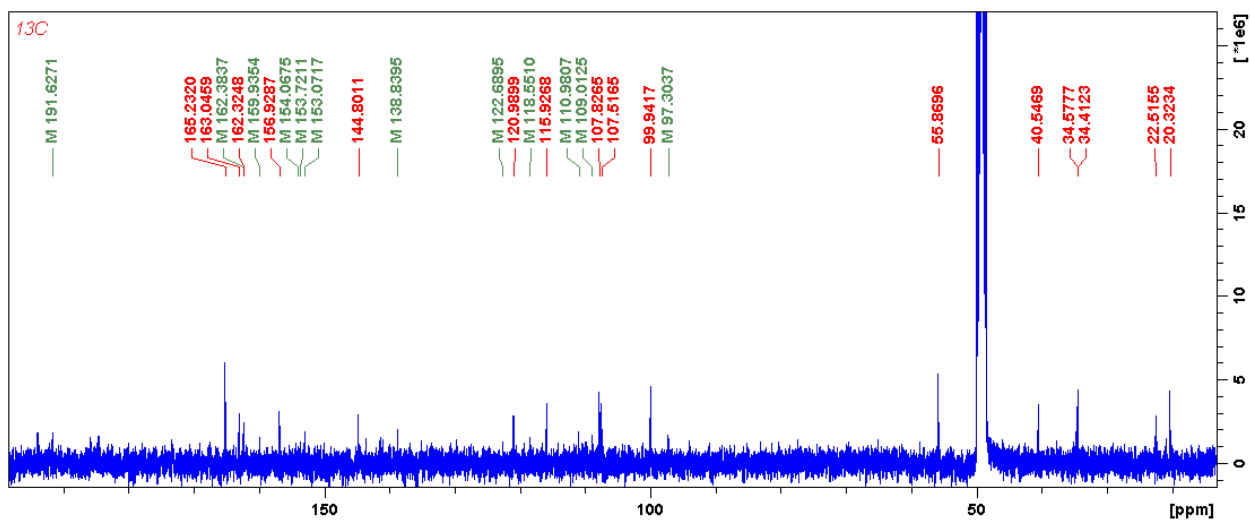

Supplementary Figure 33. <sup>13</sup>C NMR spectrum for compound 5. Condition: CD<sub>3</sub>OD, 100 MHz.

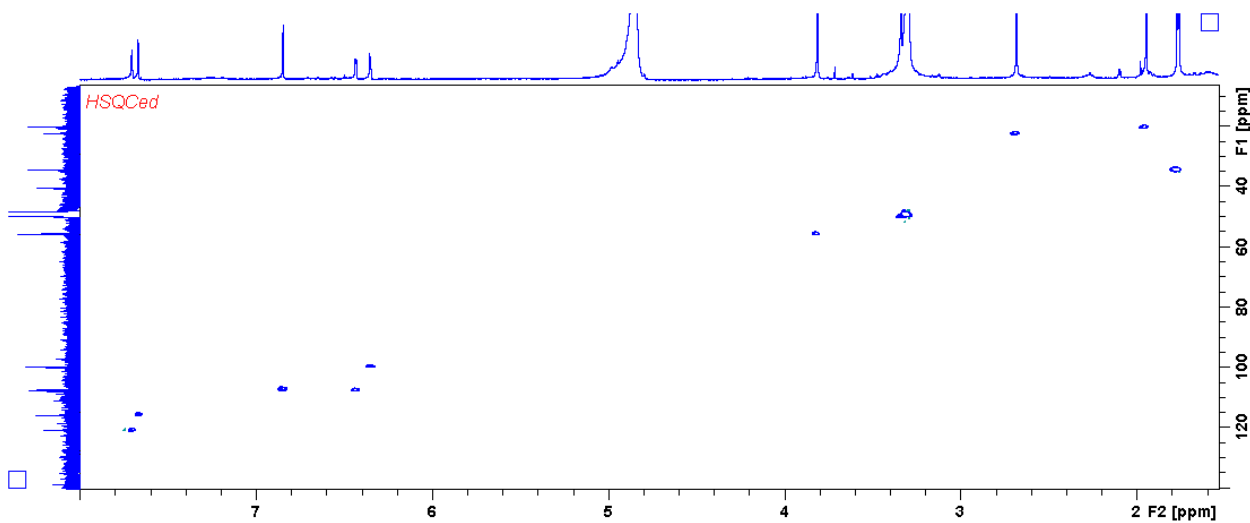

Supplementary Figure 34. HSQC spectrum for compound 5. Condition: CD<sub>3</sub>OD.

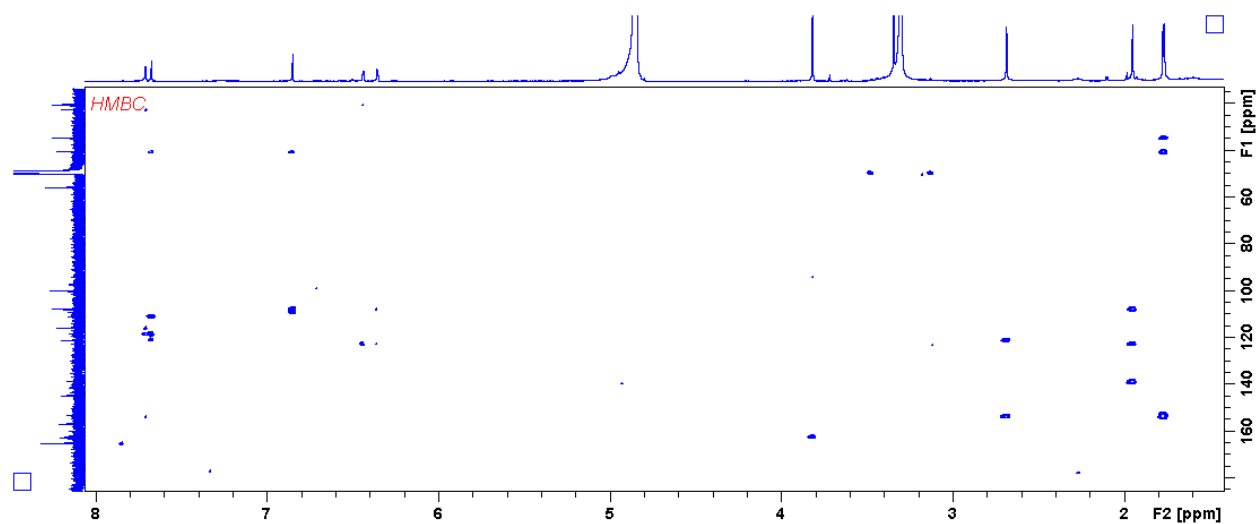

Supplementary Figure 35. HMBC spectrum for compound 5. Condition: CD<sub>3</sub>OD.

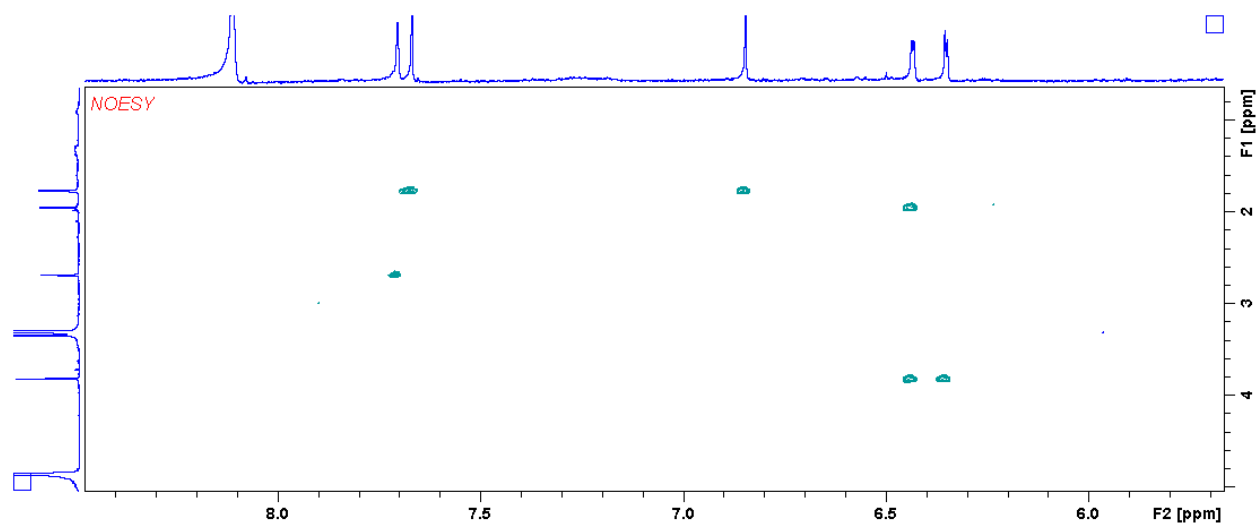

Supplementary Figure 36. NOESY spectrum for compound 5. Condition: CD<sub>3</sub>OD.



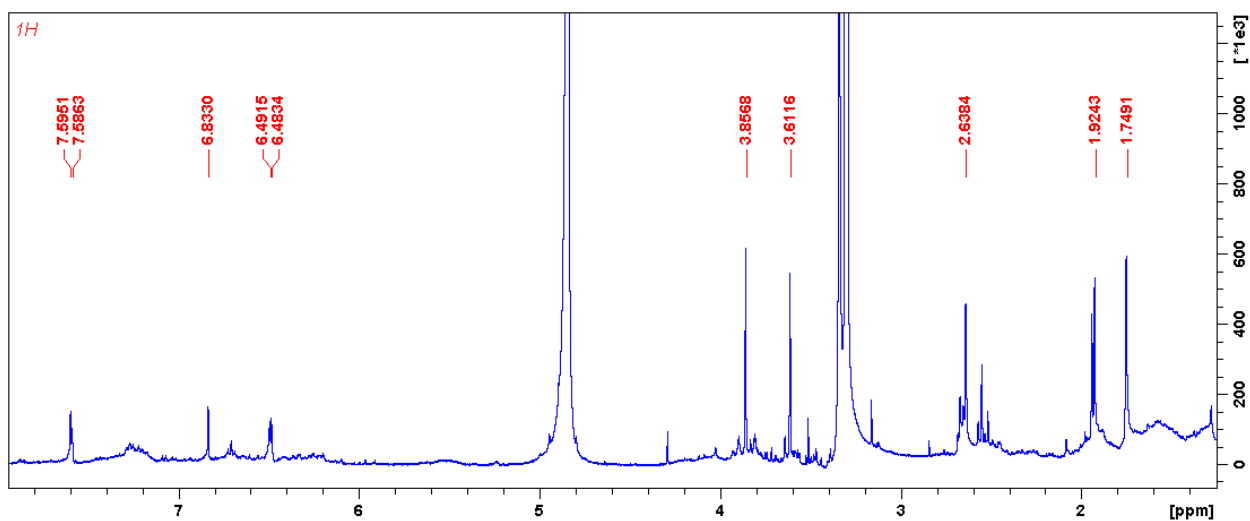

Supplementary Figure 37. <sup>1</sup>H NMR spectrum for compound 6. Condition: CD<sub>3</sub>OD, 400 MHz.

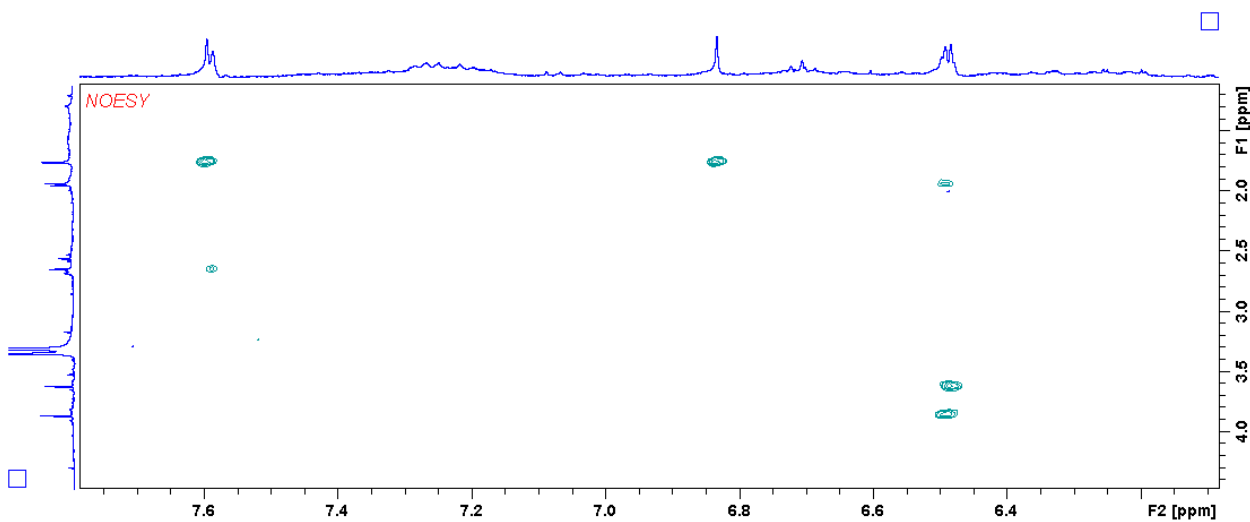

Supplementary Figure 38. NOESY spectrum for compound 6. Condition: CD<sub>3</sub>OD.

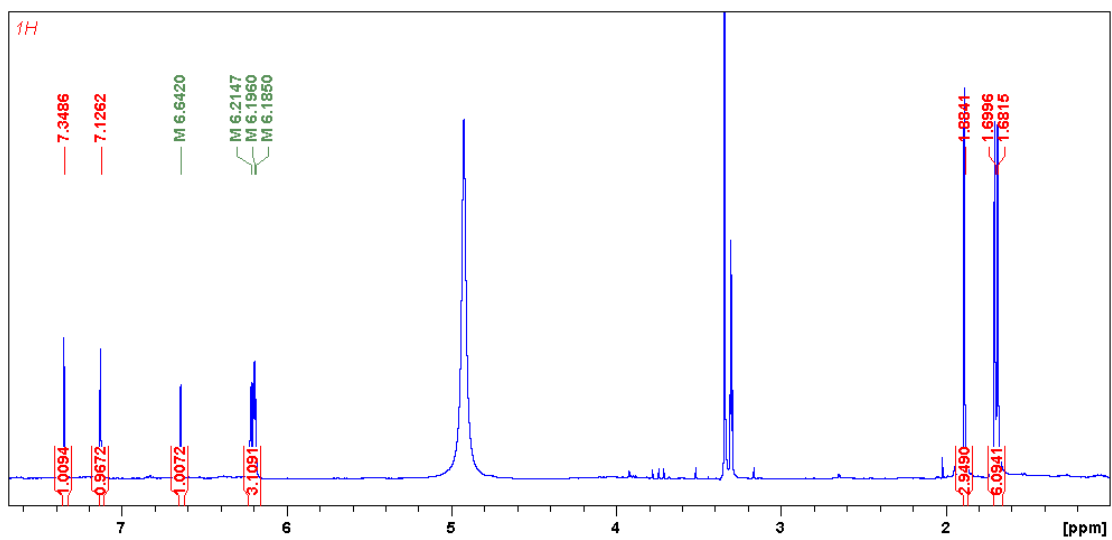

Supplementary Figure 39.  $^1\text{H}$  NMR spectrum for compound 13. Condition:  $\text{CD}_3\text{OD}$ , 400 MHz.

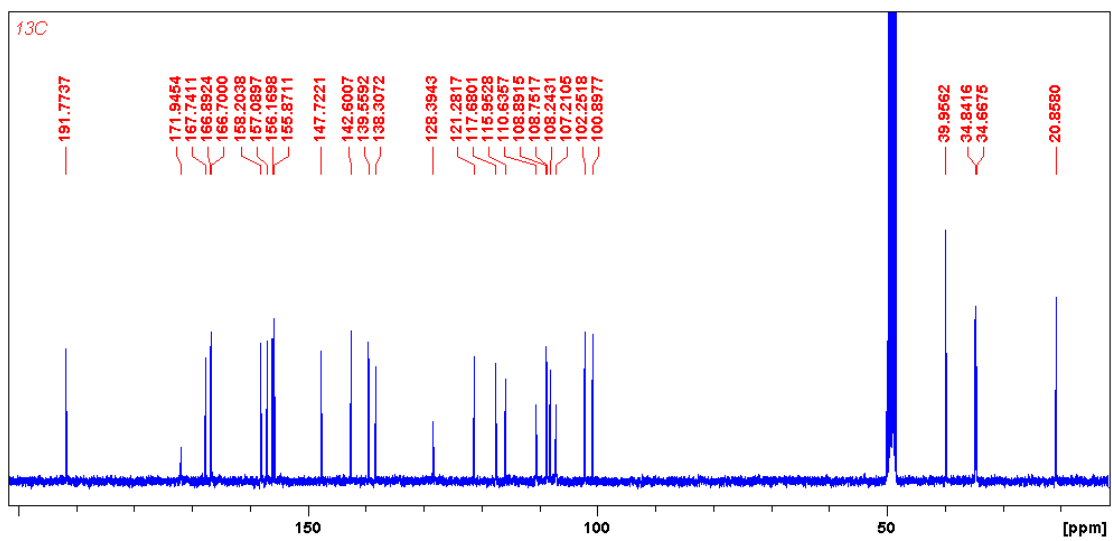

Supplementary Figure 40.  $^{13}\text{C}$  NMR spectrum for compound 13. Condition:  $\text{CD}_3\text{OD}$ , 100 MHz.

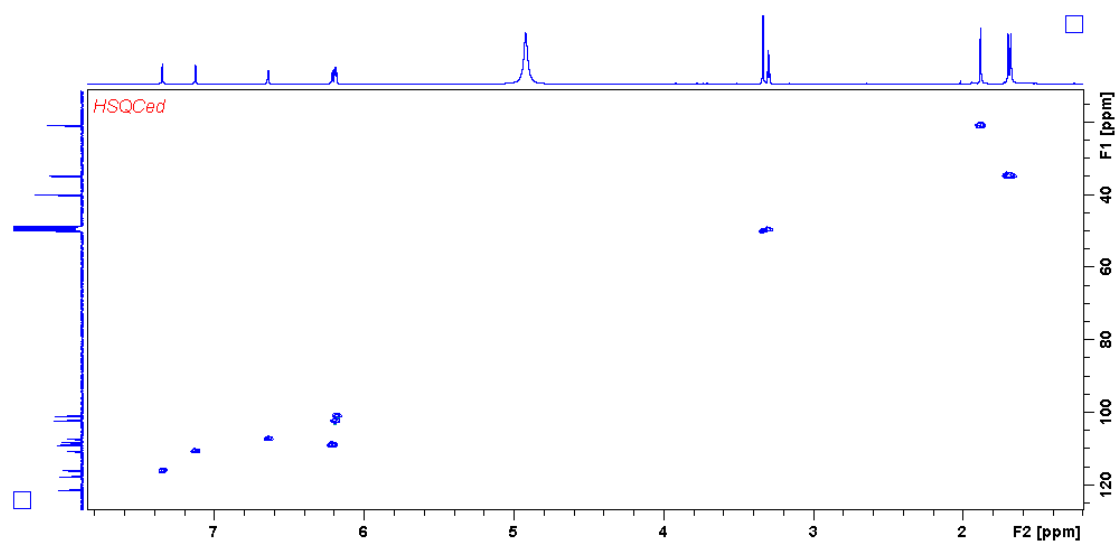

Supplementary Figure 41. HSQC spectrum for compound 13. Condition: CD<sub>3</sub>OD.

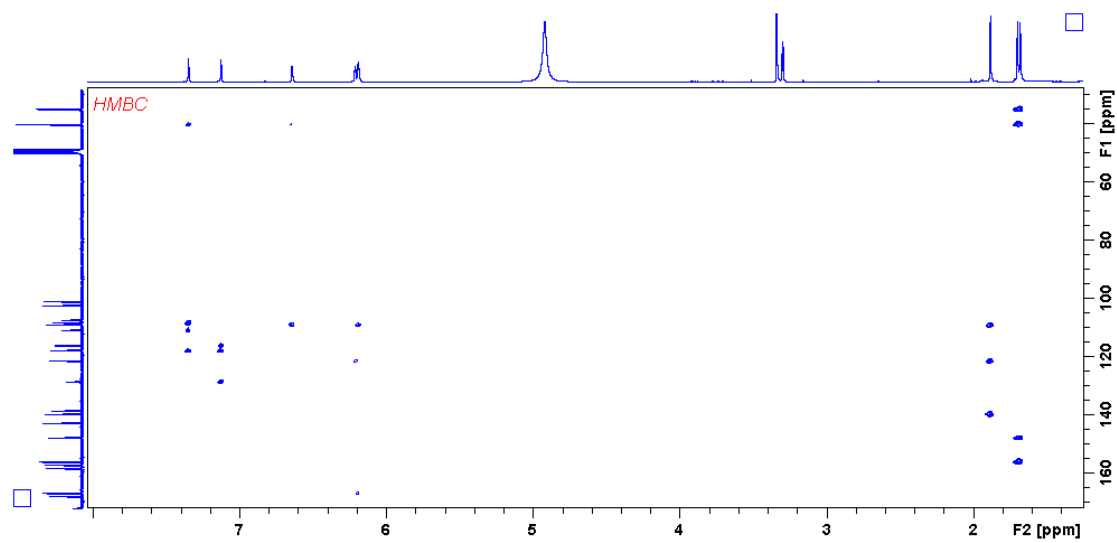

Supplementary Figure 42. HMBC spectrum for compound 13. Condition: CD<sub>3</sub>OD.

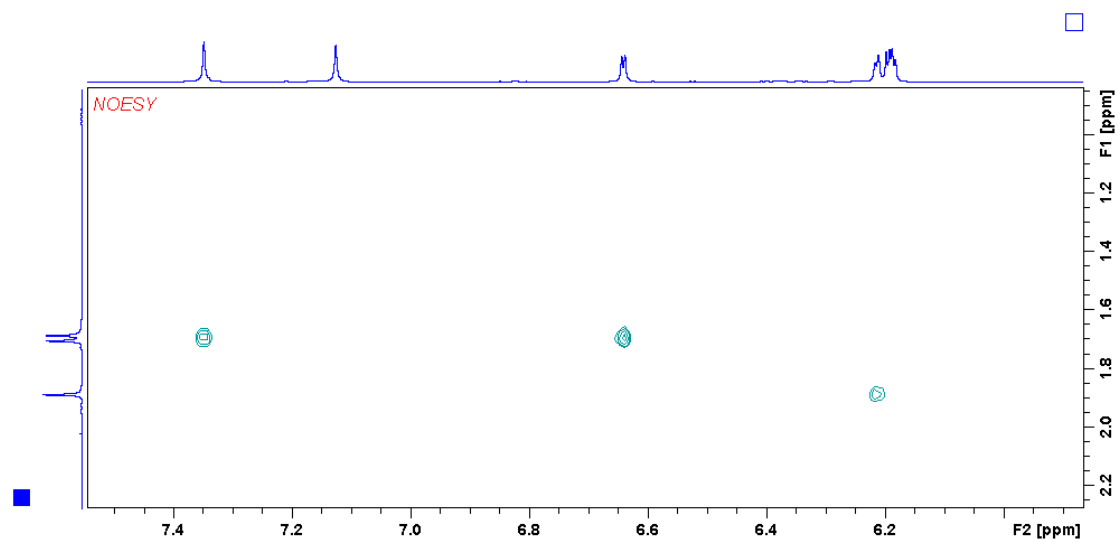

**Supplementary Figure 43. NOESY spectrum for compound 13. Condition: CD<sub>3</sub>OD.**

**Supplementary Table 1. Strains made or used in this study.**

| Strain                                                   | Description                                                                                                                                                                   | Plasmid               | Resistance                            | Source or Reference                                      |
|----------------------------------------------------------|-------------------------------------------------------------------------------------------------------------------------------------------------------------------------------|-----------------------|---------------------------------------|----------------------------------------------------------|
| <i>E. coli</i><br>ET12567                                | <i>dam<sup>-</sup> dcm<sup>-</sup> hsdS<sup>-</sup></i>                                                                                                                       | <i>pUZ8002</i>        | <i>Cm<sup>R</sup>/Tet<sup>R</sup></i> | MacNeil <i>et al.</i> <sup>1</sup>                       |
| <i>E. coli</i><br>Top10                                  | F– <i>mcrA</i> Δ( <i>mrr-hsdRMSmcrBC</i> )<br>Φ80 <i>lacZ</i> ΔM15<br>Δ <i>lacX74 recA1 endA1</i><br><i>araD139</i> Δ( <i>ara leu</i> ) 7697<br><i>galU galK rpsL nupG</i>    |                       |                                       | Invitrogen,<br>USA<br>MacNeil <i>et al.</i> <sup>1</sup> |
| <i>E. coli</i><br>DH10β                                  | F– <i>mcrA</i> Δ( <i>mrr-hsdRMSmcrBC</i> )<br>Φ80 <i>lacZ</i> ΔM15<br>Δ <i>lacX74 recA1 endA1</i><br><i>araD139</i> Δ( <i>ara leu</i> ) 7697<br><i>galU galK rpsL nupG λ–</i> |                       |                                       | Invitrogen,<br>USA                                       |
| <i>S. formicae</i>                                       | Wild-type strain                                                                                                                                                              |                       |                                       | MacNeil <i>et al.</i> <sup>1</sup>                       |
| <i>S. formicae</i><br>Δ <i>for</i>                       | Formicamycin ( <i>for</i> ) biosynthetic gene cluster (BCG) deleted                                                                                                           |                       |                                       | MacNeil <i>et al.</i> <sup>1</sup>                       |
| <i>S. formicae</i><br>Δ <i>for:for</i><br>ΦC31           | <i>for</i> BGC deleted and complemented with the <i>for</i> BGC in trans at ΦC31                                                                                              | <i>PESAC-13 215-G</i> | <i>Kan<sup>R</sup>/Tsr</i>            | MacNeil <i>et al.</i> <sup>1</sup>                       |
| <i>S. formicae</i><br>Δ <i>forV</i>                      | Halogenase ( <i>forV</i> ) gene deleted                                                                                                                                       |                       |                                       | MacNeil <i>et al.</i> <sup>1</sup>                       |
| <i>S. formicae</i><br>Δ <i>forV:forV</i><br><i>pForV</i> | Halogenase ( <i>forV</i> ) deleted and complemented at ΦBT1 under the native promoter                                                                                         | <i>pRD004</i>         | <i>Hyg<sup>R</sup></i>                | MacNeil <i>et al.</i> <sup>1</sup>                       |
| <i>S. formicae</i><br>Δ <i>forD</i>                      | Cyclase ( <i>forD</i> ) gene deleted                                                                                                                                          |                       |                                       | This work                                                |
| <i>S. formicae</i>                                       | Cyclase ( <i>forD</i> ) deleted and complemented at                                                                                                                           | <i>pRD012</i>         | <i>Hyg<sup>R</sup></i>                | This work                                                |

|                                                         |                                                                                                                                                |        |                  |           |
|---------------------------------------------------------|------------------------------------------------------------------------------------------------------------------------------------------------|--------|------------------|-----------|
| $\Delta forD:forD$<br>$pForD$                           | $\Phi$ BT1 under the native promoter                                                                                                           |        |                  |           |
| <i>S. formicae</i><br>$\Delta forL$                     | Cyclase ( <i>forL</i> ) gene deleted                                                                                                           |        |                  | This work |
| <i>S. formicae</i><br>$\Delta forL:forL$<br>$pForL$     | Cyclase ( <i>forL</i> ) deleted and complemented at $\Phi$ BT1 under the native promoter                                                       | pRD013 | Hyg <sup>R</sup> | This work |
| <i>S. formicae</i><br>$\Delta forS$                     | Cyclase ( <i>forR</i> ) gene deleted                                                                                                           |        |                  | This work |
| <i>S. formicae</i><br>$\Delta forS:forS$<br>$pErmE^*$   | Cyclase ( <i>forR</i> ) deleted and complemented at $\Phi$ BT1 under the ErmE* promoter                                                        | pRD015 | Hyg <sup>R</sup> | This work |
| <i>S. formicae</i><br>$\Delta forR$                     | Cyclase ( <i>forS</i> ) gene deleted                                                                                                           |        |                  | This work |
| <i>S. formicae</i><br>$\Delta forR:forR-A$<br>$pErmE^*$ | Cyclase ( <i>forS</i> ) deleted and complemented with <i>forR</i> and <i>forA</i> (directly downstream) at $\Phi$ BT1 under the ErmE* promoter | pRD017 | Hyg <sup>R</sup> | This work |
| <i>S. formicae</i><br>$\Delta forU$                     | Cyclase ( <i>forU</i> ) gene deleted                                                                                                           |        |                  | This work |
| <i>S. formicae</i><br>$\Delta forU:forU-V$<br>$pErmE^*$ | Cyclase ( <i>forU</i> ) deleted and complemented with <i>forU</i> and <i>forV</i> (directly downstream) at $\Phi$ BT1 under the ErmE* promoter | pRD019 | Hyg <sup>R</sup> | This work |

**Supplementary Table 2. Plasmids and ePACs used in this study.**

| <b>Plasmids and ePACs</b> | <b>Description</b>                                                                                                                                                                                           | <b>Source or Reference</b>         |
|---------------------------|--------------------------------------------------------------------------------------------------------------------------------------------------------------------------------------------------------------|------------------------------------|
| pCRISPomyces-2            | <i>Streptomyces</i> plasmid for expression of codon-optimized Cas9 and a single guide RNA                                                                                                                    | Cobb <i>et al.</i> <sup>2</sup>    |
| pUZ8002                   | Non-transmissible RK2 derivative with a mutation in <i>oriT</i>                                                                                                                                              | Kieser <i>et al.</i> <sup>3</sup>  |
| pESAC13-215-G             | ePAC clone harbouring the <i>For</i> BGC integrative $\Phi$ C31                                                                                                                                              | MacNeil <i>et al.</i> <sup>1</sup> |
| pMS82                     | $\Phi$ BT1 <i>attP-int</i> derived integration vector for the conjugal transfer of DNA from <i>E. coli</i> to <i>Streptomyces</i> (Hyg <sup>R</sup> )                                                        | Gregory <i>et al.</i> <sup>4</sup> |
| pIJ10257                  | Plasmid for the conjugal transfer of DNA (under control of the ermE* constitutive promoter) from <i>E. coli</i> to <i>Streptomyces</i> spp. Integrates specifically at the $\Phi$ BT1 attachment site (HygR) | Hong <i>et al.</i> <sup>5</sup>    |
| pRD004                    | PMS82 pForV ForV complementation plasmid                                                                                                                                                                     | This work                          |
| pRD012                    | PMS82 pForD ForD complementation plasmid                                                                                                                                                                     | This work                          |
| pRD013                    | PMS82 pForL ForL complementation plasmid                                                                                                                                                                     | This work                          |
| pRD015                    | pIJ10257 ForR-ForA complementation plasmid                                                                                                                                                                   | This work                          |
| pRD017                    | pIJ10257 ForS complementation plasmid                                                                                                                                                                        | This work                          |
| pRD019                    | pIJ10257 ForU-ForV complementation plasmid                                                                                                                                                                   | This work                          |

**Supplementary Table 3. Growth media used in this study**

| <b>Media</b> | <b>Recipe (per litre)</b>                                                                                 | <b>Water</b>           | <b>pH</b> |
|--------------|-----------------------------------------------------------------------------------------------------------|------------------------|-----------|
| LB           | 10 g tryptone<br>5 g yeast extract<br>10 g NaCl (omitted when selecting with Hygromycin)<br>+/- 20 g agar | Deionised              | 7.5       |
| MS           | 20 g soy flour<br>20 g mannitol<br>20 g agar                                                              | Tap                    | As made   |
| MYM          | 4 g maltose<br>4 g yeast extract<br>10 g malt extract<br>18g agar                                         | 50:50<br>Tap:Deionised | 7.3       |

**Supplementary Table 4. Antibiotics used in this study.**

| <b>Antibiotic</b> | <b>Final concentration used for selection (<math>\mu\text{g ml}^{-1}</math>)</b> |
|-------------------|----------------------------------------------------------------------------------|
| Apramycin         | 50                                                                               |
| Hygromycin        | 50                                                                               |
| Kanamycin         | 50                                                                               |
| Chloramphenicol   | 30                                                                               |
| Nalidixic Acid    | 25                                                                               |



## Supplementary Note 1. Characterization of compounds reported in this study

**6-chlorogenistein.** Yield: 2 mg; UV/Vis:  $\lambda_{\max}$  = 259 nm; Molecular formula:  $C_{15}H_9O_5Cl$ ; HRMS (ESI)  $m/z$ : calculated  $[M + H]^+ = 305.0211$ , observed  $[M + H]^+ = 305.0212$ ,  $\Delta = 0.33$  ppm;  $^1H$  NMR (400 MHz,  $CD_3OD$ ):  $\delta$  8.2 (s, 1H, 2-*H*), 7.4 (s, 1H, 3'-*H*), 7.4 (s, 1H, 5'-*H*), 6.9 (s, 1H, 6'-*H*), 6.8 (s, 1H, 2'-*H*), 6.4 (s, 1H, 8-*H*);  $^{13}C$  NMR (100 MHz,  $CD_3OD$ ):  $\delta$  182.3 (C-4), 162.2 (C-5), 162.0 (C-7), 159.2 (C-4'), 155.0 (C-8a), 155.0 (C-2), 131.6 (C-3'), 131.6 (C-5'), 125.2 (C-1'), 123.1 (C-3), 116.5 (C-2'), 116.5 (C-6'), 107.0 (C-4A), 100.5 (C-8), 99.5 (C-6). An isomer of 6-chlorogenistein, identified based on based on UV and MS characteristics, and likely to be a chlorination regioisomer, was also identified in the LCMS trace but was not isolated due to low levels of production. The NMR data for 6-chlorogenistein is in accordance with that reported previously<sup>6</sup>.

**Formicapyridine A (1).** Yield: 1 mg; UV/Vis:  $\lambda_{\max}$  = 228, 249, 272 and 391 nm; specific rotation:  $[\alpha]_D^{20} = +9.9$  (c = 0.09, methanol); Molecular formula:  $C_{27}H_{23}NO_6$ ; HRMS (ESI)  $m/z$ : calculated  $[M + H]^+ = 458.1598$ , observed  $[M + H]^+ = 458.1600$ ,  $\Delta = 0.44$  ppm;  $^1H$  NMR (400 MHz,  $CD_3OD$ ):  $\delta$  7.7 (s, 1H, 20-*H*), 7.7 (s, 1H, 22-*H*), 6.7 (d, J = 2.21 Hz, 1H, 16-*H*), 6.3 (d, J = 2.21 Hz, 1H, 2-*H*), 6.3 (d, J = 1.64 Hz, 1H, 4-*H*), 6.3 (d, J = 1.64 Hz, 1H, 14-*H*), 2.7 (s, 3H, 25-*H*), 1.9 (s, 3H, 24-*H*), 1.8 (s, 3H, 26-*H*), 1.8 (s, 3H, 27-*H*);  $^{13}C$  NMR (100 MHz,  $CD_3OD$ ):  $\delta$  191.6 (C-11), 167.8 (C-15), 167.7 (C-13), 167.5 (C-9), 159.9 (C-7), 157.0 (C-5), 155.7 (C-17), 155.1 (C-19), 152.6 (C-23), 144.7 (C-21), 138.8 (C-1), 121.3 (C-22), 120.9 (C-6), 118.6 (C-8), 115.7 (C-20), 111.3 (C-10), 109.4 (C-2), 108.5 (C-12), 107.9 (C-16), 102.5 (C-14), 101.2 (C-4), 40.7 (C-18), 34.7 (C-27), 34.5 (C-26), 22.1 (C-25), 20.2 (C-24).

**Formicapyridine B (2).** Yield: 2 mg; UV/Vis:  $\lambda_{\max}$  = 229, 249, 272 and 392 nm; specific rotation:  $[\alpha]_D^{20} = +7.7$  (c = 0.18, methanol); Molecular formula:  $C_{28}H_{25}NO_6$ ; HRMS (ESI)  $m/z$ : calculated  $[M + H]^+ = 472.1755$ , observed  $[M + H]^+ = 472.1753$ ,  $\Delta = -0.42$  ppm;  $^1H$  NMR (400 MHz,  $CD_3OD$ ):  $\delta$  7.6 (s, 1H, 22-*H*), 7.6 (s, 1H, 20-*H*), 6.7 (d, J = 2.25 Hz, 1H, 16-*H*), 6.4 (d, J = 2.27 Hz, 1H, 2-*H*), 6.3 (d, J = 2.27 Hz, 1H, 4-*H*), 6.2 (d, J = 2.25 Hz, 1H, 14-*H*), 3.8 (s, 3H, 28-*H*), 2.7 (s, 3H, 25-*H*), 1.9 (s, 3H, 24-*H*), 1.8 (s, 3H, 26-*H*), 1.7 (s, 3H, 17-*H*);  $^{13}C$  NMR (100 MHz,  $CD_3OD$ ):  $\delta$  191.8 (C-11), 167.5 (C-13), 167.4 (C-15), 167.3 (C-9), 161.7 (C-3), 160.1 (C-7), 156.7 (C-5), 155.8 (C-17), 155.5 (C-23), 152.7 (C-19), 144.4 (C-21), 138.6 (C-1), 124.9 (C-6), 119.9 (C-22), 118.6 (C-8), 115.6 (C-20), 110.6 (C-10), 108.6 (C-12), 107.7 (C-2), 107.6 (C-16), 102.5 (C-14), 99.9 (C-4), 55.8 (C-28), 40.5 (C-18), 34.8 (C-27), 34.6 (C-26), 23.6 (C-25), 20.4 (C-24).

**Formicapyridine C (3).** Yield: 2 mg; UV/Vis:  $\lambda_{\max}$  = 228, 249, 272 and 391 nm; specific rotation:  $[\alpha]_D^{20} = +8.8$  (c = 0.18, methanol); Molecular formula:  $C_{29}H_{27}NO_6$ ; HRMS (ESI)  $m/z$ : calculated  $[M + H]^+ = 486.1911$ , observed  $[M + H]^+ = 486.1905$ ,  $\Delta = -1.23$  ppm;  $^1H$  NMR (400 MHz,  $CD_3OD$ ):  $\delta$  7.6 (s, 1H, 22-*H*), 7.6 (s, 1H, 20-*H*), 6.7 (d, J = 2.30 Hz, 1H, 16-*H*), 6.5 (d, J = 2.33 Hz, 1H, 2-*H*), 6.5 (d, J = 2.33 Hz, 1H, 4-*H*), 6.2 (d, J = 2.30 Hz, 1H, 14-*H*), 3.9 (s, 3H, 28-*H*), 3.6 (s, 3H, 29-*H*), 2.6 (s, 3H, 25-*H*), 1.9 (s, 3H, 24-*H*), 1.8 (s, 3H, 27-*H*), 1.7 (s, 3H, 26-*H*);  $^{13}C$  NMR (100 MHz,  $CD_3OD$ ):  $\delta$  191.9 (C-11), 167.7 (C-15), 167.4 (C-13), 167.2 (C-9), 162.4 (C-3), 161.0 (C-7), 159.7 (C-5), 155.8 (C-17), 154.5 (C-23), 153.6 (C-19), 144.4 (C-21), 138.5, (C-1) 125.1 (C-6), 120.4 (C-22), 118.4 (C-8), 115.7 (C-20), 110.8 (C-10), 108.5 (C-12), 107.8 (C-16), 107.7 (C-2), 102.5 (C-14), 97.0 (C-4), 56.3 (C-29), 56.0 (C-28), 40.6 (C-18), 34.6 (C-26), 34.6 (C-27), 23.1 (C-25), 20.2 (C-24).

**Formicapyridine D (4).** Yield: 0.7 mg; UV/Vis:  $\lambda_{\max}$  = 228, 252, and 391 nm; specific rotation:  $[\alpha]_D^{20} = +11.0$  (c = 0.06, methanol); Molecular formula:  $C_{27}H_{22}NO_6Cl$ ; HRMS (ESI)  $m/z$ : calculated  $[M + H]^+ = 492.1218$ , observed  $[M + H]^+ = 492.1208$ ,  $\Delta = 2.03$  ppm;  $^1H$  NMR (400 MHz,  $CD_3OD$ ):  $\delta$  7.6 (s, 1H, 22-*H*), 7.6 (s, 1H, 20-*H*), 6.8 (s, 1H, 16-*H*), 6.3 (d, J = 2.32 Hz, 1H, 2-*H*), 6.3 (d, J = 2.32 Hz, 1H, 4-*H*), 2.6 (s, 3H, 25-*H*), 1.9 (s, 3H, 24-*H*), 1.7 (s, 3H, 26-*H*), 1.7 (s, 3H, 27-*H*).

**Formicapyridine E (5).** Yield: 1 mg; UV/Vis:  $\lambda_{\max}$  = 218, 252, and 391 nm; specific rotation:  $[\alpha]_D^{20} = +12.1$  (c = 0.09, methanol); Molecular formula:  $C_{28}H_{24}NO_6Cl$ ; HRMS (ESI)  $m/z$ : calculated  $[M + H]^+ = 506.1365$ , observed  $[M + H]^+ = 506.1362$ ,  $\Delta = -0.59$  ppm;  $^1H$  NMR (400 MHz,  $CD_3OD$ ):  $\delta$  7.7 (s, 1H, 22-*H*), 7.7 (s, 1H, 20-*H*), 6.8 (d, 1H, 16-*H*), 6.4 (d, J = 2.22 Hz, 1H, 2-*H*), 6.3 (d, J = 2.22 Hz, 1H, 4-*H*), 3.8 (s, 3H, 28-*H*), 2.7 (s, 3H, 25-*H*), 1.9 (s, 3H, 24-*H*), 1.7 (s, 3H, 26-*H*), 1.7 (s, 3H, 27-*H*);  $^{13}C$  NMR (100 MHz,  $CD_3OD$ ):  $\delta$  191.6 (C-11), 165.2 (C-13), 163.0 (C-15), 162.4 (C-3), 162.3 (C-9), 159.9 (C-7), 156.9 (C-5), 154.1 (C-17), 153.7 (C-23), 153.1 (C-19), 144.8 (C-21), 138.8 (C-1), 122.7 (C-6), 121.0 (C-22), 118.6 (C-8), 115.9 (C-20), 111.0 (C-10), 109.0 (C-12), 107.8 (C-2), 107.5 (C-16), 99.9 (C-4), 97.3 (C-14), 55.9 (C-28), 40.5 (C-18), 34.6 (C-27), 34.4 (C-26), 22.5 (C-25), 20.3 (C-24).

**Formicapyridine F (6).** Yield: 0.6 mg; UV/Vis:  $\lambda_{\max}$  = 231, 252, and 391 nm; specific rotation:  $[\alpha]_D^{20} = +12.8$  (c = 0.06, methanol); Molecular formula:  $C_{29}H_{26}NO_6Cl$ ; HRMS (ESI)  $m/z$ : calculated  $[M + H]^+ = 520.1521$ , observed  $[M + H]^+ = 520.1525$ ,  $\Delta = 0.77$  ppm;  $^1H$  NMR (400 MHz,  $CD_3OD$ ):  $\delta$  7.6 (s, 1H, 22-*H*), 7.6 (s, 1H, 20-*H*), 6.8 (d, 1H, 16-*H*), 6.5 (d, J = 2.33 Hz, 1H, 2-*H*), 6.5 (d, J = 2.33 Hz, 1H, 4-*H*), 3.9 (s, 3H, 28-*H*), 3.6 (s, 3H, 29-*H*), 2.6 (s, 3H, 25-*H*), 1.9 (s, 3H, 24-*H*), 1.7 (s, 3H, 26-*H*), 1.7 (s, 3H, 27-*H*).

**Fasamycin F (13).** Yield: 3.4 mg; UV/Vis:  $\lambda_{\max}$  = 247, 287, 357 and 414 nm; specific rotation:  $[\alpha]_{\text{D}}^{20}$  = 4.3 (0.54, methanol); Molecular formula: C<sub>28</sub>H<sub>29</sub>O<sub>9</sub>; HRMS (ESI)  $m/z$ : calculated  $[M + H]^+$  = 503.1337, observed  $[M + H]^+$  = 503.1326,  $\Delta$  = -0.29 ppm; <sup>1</sup>H NMR (400 MHz, CD<sub>3</sub>OD):  $\delta$  7.3 (s, 1H, 20-*H*), 7.1 (s, 1H, 22-*H*), 6.6 (d,  $J$  = 2.22 Hz, 1H, 16-*H*), 6.2 (d,  $J$  = 2.22 Hz, 1H, 14-*H*), 6.2 (d,  $J$  = 2.30 Hz, 1H, 2-*H*), 6.2 (d,  $J$  = 2.30 Hz, 1H, 4-*H*), 1.9 (s, 3H, 28-*H*), 1.7 (s, 3H, 25-*H*), 1.7 (s, 3H, 26-*H*); <sup>13</sup>C NMR (100 MHz, CD<sub>3</sub>OD):  $\delta$  191.8 (C-11), 172.0 (C-27), 167.7 (C-9), 166.9 (C-13), 166.7 (C-15), 158.2 (C-3), 157.1 (C-23), 156.2 (C-5), 155.9 (C-17), 147.7 (C-19), 142.6 (C-21), 139.6 (C-1), 138.3 (C-7), 128.4 (C-24), 121.3 (C-6), 117.7 (C-8), 116.0 (C-20), 110.6 (C-22), 108.9 (C-2), 108.8 (C-12), 108.2 (C-10), 107.2 (C-16), 102.3 (C-14), 100.9 (C-4), 40.0 (C-18), 34.8 (C-26), 34.7 (C-25), 20.9 (C-28).

## Supplementary References

- [1] MacNeil, D. J., Gewain, K. M., Ruby, C. L., Dezeny, G., Gibbons, P. H., MacNeil, T. Analysis of *Streptomyces avermitilis* genes required for avermectin biosynthesis utilizing a novel integration vector. *Gene*. **111**, 61-68 (1992).
- [2] Cobb, R. E., Wang, Y. & Zhao, H. High-efficiency multiplex genome editing of *Streptomyces* species using an engineered CRISPR/Cas system. *ACS Synth. Biol.* **4**, 723-728 (2015).
- [3] Kieser, T., Bibb, M. J., Buttner, M. J., Chater, K. F., Hopwood, D. A. *Practical Streptomyces Genetics* (The John Innes Foundation Press, Norwich, 2000).
- [4] Gregory, M. A., Till, R., Smith, M. C. M. Integration site for *Streptomyces* phage  $\phi$ BT1 and development of site-specific integrating vectors. *J Bacteriol.* **185**, 5320-5323 (2003).
- [5] Hong, H. J., Hutchings, M. I., Hill, L. M., Buttner, M. J. The role of the novel fem protein VanK in vancomycin resistance in *Streptomyces coelicolor*. *J. Biol. Chem.* **280**, 13055-13061 (2005).
- [6] König, W. A., Krauss, C., Zahner, H. Metabolites from microorganisms, 6-chlorogenistein and 6,3'-dichlorogenistein. *Helv. Chim. Acta.* **60**, 2071-2078 (1977).
